# Supplementary material for: One-pot three-component tandem reaction of diazo compounds with anilines and unsaturated ketoesters: a novel synthesis of 2,3-dihydropyrrole derivatives
Source: Royal Society of Chemistry journal article supplement (doi:10.1039/b822626a), 2009-01-01

## Supplementary Information

### One-pot Three-component Tandem Reaction of Diazo Compounds with Anilines and Unsaturated Ketoesters: a Novel Synthesis of 2,3-Dihydropyrrole Derivatives

Yingguang Zhu, Changwei Zhai, Yongli Yue, Liping Yang, Wenhao Hu\*

*Department of Chemistry, East China Normal University, Shanghai 200062, P. R. China*

[whu@chem.ecnu.edu.cn](mailto:whu@chem.ecnu.edu.cn)

#### Table of Contents

|                                                                                                                                                              | Page |
|--------------------------------------------------------------------------------------------------------------------------------------------------------------|------|
| General Considerations.....                                                                                                                                  | S2   |
| Synthesis of Substrates.....                                                                                                                                 | S2   |
| General Procedure for the One-pot Three-component Tandem Reaction of Diazo Compounds with Anilines and $\beta,\gamma$ -Unsaturated $\alpha$ -Ketoesters..... | S2   |
| Characterization Data of Compounds.....                                                                                                                      | S3   |
| Notes and References.....                                                                                                                                    | S16  |
| NMR spectra for the Compounds.....                                                                                                                           | S17  |

### General Considerations:

All moisture sensitive reactions were performed under an argon atmosphere in a well-dried reaction flask. Dichloromethane ( $\text{CH}_2\text{Cl}_2$ ), 1,2-dichloroethane ( $\text{ClCH}_2\text{CH}_2\text{Cl}$ ) and chloroform ( $\text{CHCl}_3$ ) were freshly distilled over calcium hydride, toluene from sodium benzophenone ketyl, respectively, prior to use. All commercially available reagents were directly used as received from vendors, unless otherwise stated.  $^1\text{H}$  and  $^{13}\text{C}$  NMR spectra were recorded on a Bruker-500 MHz spectrometer. Chemical shifts are reported in ppm relative to the internal standard tetramethylsilane ( $\delta = 0$  ppm) for  $^1\text{H}$  NMR and deuteriochloroform ( $\delta = 77.00$  ppm) for  $^{13}\text{C}$  NMR spectroscopy. HRMS spectra were recorded on a GCT Premier instrument.

### Synthesis of Substrates:

$\beta,\gamma$ -unsaturated  $\alpha$ -ketoesters **3a-3g** were prepared according to the literature procedure.<sup>1</sup> Substrate **3h** was synthesized following another literature procedure.<sup>2</sup> Various aryl diazo compounds **1a-1d** were prepared by the treatment of corresponding arylacetate with *p*-acetamidobenzenesulfonyl azide (*p*-ABSA) in the presence of DBU following the general procedure.<sup>3</sup>

### General procedure for the one-pot three-component tandem reaction of diazo compounds with anilines and $\beta,\gamma$ -unsaturated $\alpha$ -ketoesters:

To a stirred solution of  $\text{Rh}_2(\text{OAc})_4$  (4.4 mg, 0.01 mmol), anilines **2** (1.2 mmol) and  $\beta,\gamma$ -unsaturated  $\alpha$ -ketoesters **3** (1 mmol) in toluene (8 ml) was added diazo compounds **1** (1.2 mmol) in 4 ml of toluene over 1 h via a syringe pump at 45 °C under Argon. After completion of the addition, the reaction mixture was cooled to room temperature. Citric acid monohydrate (42 mg, 0.2 mmol) was added and the reaction mixture was refluxed for 3-4 h under azeotropic distillation conditions. After the reaction was completed, the reaction mixture was cooled to room temperature. Solvent was removed, and a portion of crude product was subjected to  $^1\text{H}$  NMR analysis for determination of the product ratio. The crude product was purified by flash chromatography on silica gel (ethyl acetate/petroleum ether = 1:80 ~ 1:40) to give the corresponding three-component products **5**.

### Characterization Data of Compounds:

Diastereomers *cis-5g/trans-5g*, *cis-5i/trans-5i*, *cis-5k/trans-5k*, *cis-5m/trans-5m* and *cis-5p/trans-5p* were unable to be separated in a pure isomer by flash chromatography on silica gel and characterized as a mixture of diastereomers.

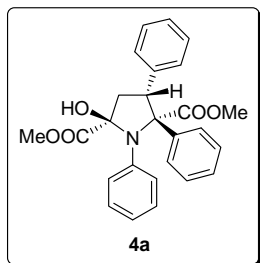

**(2S\*,3R\*,5R\*)-dimethyl 5-hydroxy-1,2,3-triphenylpyrrolidine-2,5-dicarboxylate (4a):**  $^1\text{H}$  NMR (500 MHz,  $\text{CDCl}_3$ )  $\delta$  7.68-7.66 (m, 2H), 7.29-7.19 (m, 6H), 7.02-6.99 (m, 2H), 6.92 (d,  $J = 6.5$  Hz, 2H), 6.68 (t,  $J = 7.5$  Hz, 1H), 6.50 (d,  $J = 8.0$  Hz, 2H), 4.38 (s, 1H), 4.03 (dd,  $J = 14.5, 6.0$  Hz, 1H), 3.80 (s, 3H), 3.64 (s, 3H), 3.33 (dd,  $J = 14.5, 12.0$  Hz, 1H), 2.25 (dd,  $J = 12.0, 6.0$  Hz, 1H);  $^{13}\text{C}$  NMR (125 MHz,  $\text{CDCl}_3$ )  $\delta$  175.66, 171.75, 142.60, 139.72, 134.64, 128.83, 128.57, 128.56, 128.16, 128.09, 127.78, 126.97, 118.98, 115.52, 91.34, 77.92, 57.55, 53.97, 51.82, 44.11; HRMS (EI)  $m/z$  calcd for  $\text{C}_{26}\text{H}_{25}\text{NO}_5$  ( $\text{M}^+$ ) 431.1733, found 431.1732.

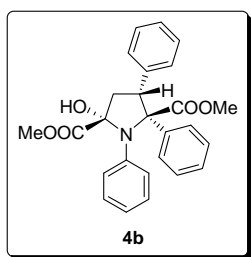

**(2R\*,3R\*,5S\*)-dimethyl 5-hydroxy-1,2,3-triphenylpyrrolidine-2,5-dicarboxylate (4b):**  $^1\text{H}$  NMR (500 MHz,  $\text{CDCl}_3$ )  $\delta$  7.21 (m, 1H), 7.16-7.12 (m, 5H), 7.08-7.04 (m, 4H), 6.75 (t,  $J = 7.5$  Hz, 1H), 6.66 (d,  $J = 7.5$  Hz, 2H), 6.49 (d,  $J = 8.0$  Hz, 2H), 4.65 (s, 1H), 4.63 (dd,  $J = 15.5, 7.0$  Hz, 1H), 3.98 (s, 3H), 3.67 (s, 3H), 2.63 (t,  $J = 13.5$  Hz, 1H), 2.38 (dd,  $J = 13.5, 6.0$  Hz, 1H);  $^{13}\text{C}$  NMR (125 MHz,  $\text{CDCl}_3$ )  $\delta$  176.51, 173.09, 141.95, 135.22, 133.89, 130.12, 129.09, 128.74, 127.87, 127.69, 127.19, 126.62, 119.05, 115.94, 88.78, 78.33, 53.96, 52.64, 52.23, 41.46; HRMS (EI)  $m/z$  calcd for  $\text{C}_{26}\text{H}_{25}\text{NO}_5$  ( $\text{M}^+$ ) 431.1733, found 431.1736.

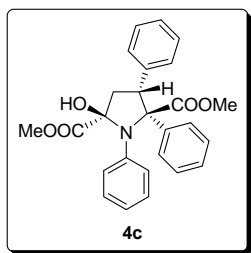

**(2R\*,3R\*,5R\*)-dimethyl 5-hydroxy-1,2,3-triphenylpyrrolidine-2,5-dicarboxylate (4c):**  $^1\text{H}$  NMR (500 MHz,  $\text{CDCl}_3$ )  $\delta$  7.18-7.04 (m, 10H), 6.76 (t,  $J = 7.5$  Hz, 1H), 6.67 (d,  $J = 8.0$  Hz, 2H), 6.62 (d,  $J = 8.0$  Hz, 2H), 4.75 (dd,  $J = 14.5, 5.5$  Hz, 1H), 4.08 (s, 1H), 3.91 (s, 3H), 3.63 (s, 3H), 2.70 (dd,  $J = 14.5, 12.0$  Hz, 1H), 2.23 (dd,  $J = 12.0, 5.5$  Hz, 1H);  $^{13}\text{C}$  NMR (125 MHz,  $\text{CDCl}_3$ )  $\delta$  174.03, 173.47, 142.75, 135.39, 134.59,

129.78, 129.12, 128.82, 127.97, 127.73, 127.23, 126.74, 119.75, 115.89, 90.64, 79.23, 53.82, 53.53, 53.01, 43.19; HRMS (EI)  $m/z$  calcd for  $C_{26}H_{25}NO_5$  ( $M^+$ ) 431.1733, found 431.1733.

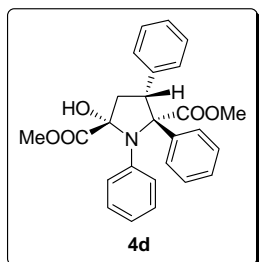

**(2S\*,3R\*,5S\*)-dimethyl 5-hydroxy-1,2,3-triphenylpyrrolidine-2,5-dicarboxylate (4d):**  $^1H$  NMR (500 MHz,  $CDCl_3$ )  $\delta$  7.60-7.58 (m, 2H), 7.31-7.23 (m, 6H), 7.05 (t,  $J = 8.5$  Hz, 2H), 6.90 (d,  $J = 7.5$  Hz, 2H), 6.74-6.72 (m, 1H), 6.46 (d,  $J = 8.5$  Hz, 2H), 4.08 (s, 1H), 3.98 (s, 3H), 3.79 (dd,  $J = 13.5, 8.0$  Hz, 1H), 3.64 (s, 3H), 3.02 (t,  $J = 13.5$  Hz, 1H), 2.77 (dd,  $J = 13.5, 8.0$  Hz, 1H).

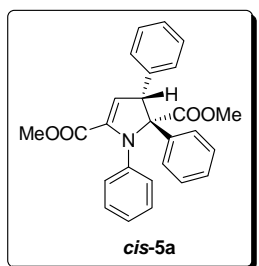

**(2S\*,3R\*)-dimethyl 2,3-dihydro-1,2,3-triphenyl-1H-pyrrole-2,5-dicarboxylate (cis-5a):**  $^1H$  NMR (500 MHz,  $CDCl_3$ )  $\delta$  7.71 (d,  $J = 7.5$  Hz, 2H), 7.42-7.39 (m, 2H), 7.35-7.31 (m, 5H), 7.28-7.26 (m, 1H), 7.09-7.05 (m, 2H), 6.90-6.92 (m, 1H), 6.73 (d,  $J = 7.5$  Hz, 2H), 5.89 (d,  $J = 3.5$  Hz, 1H), 4.50 (d,  $J = 3.5$  Hz, 1H), 3.77 (s, 3H), 2.79 (s, 3H);  $^{13}C$  NMR (125 MHz,  $CDCl_3$ )  $\delta$  169.35, 162.43, 143.69, 142.42, 140.43, 138.60, 129.43, 128.24, 128.13, 128.03, 127.78, 127.70, 127.52, 122.80, 121.05, 115.32, 83.70, 63.26, 52.09, 50.98; HRMS (EI)  $m/z$  calcd for  $C_{26}H_{23}NO_4$  ( $M^+$ ) 413.1627, found 413.1622.

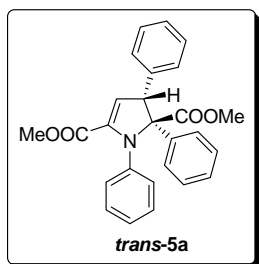

**(2R\*,3R\*)-dimethyl 2,3-dihydro-1,2,3-triphenyl-1H-pyrrole-2,5-dicarboxylate (trans-5a):**  $^1H$  NMR (500 MHz,  $CDCl_3$ )  $\delta$  7.11-7.08 (m, 2H), 7.02-6.92 (m, 9H), 6.84 (d,  $J = 7.5$  Hz, 2H), 6.76 (d,  $J = 7.5$  Hz, 2H), 5.96 (d,  $J = 2.5$  Hz, 1H), 5.52 (d,  $J = 2.5$  Hz, 1H), 3.75 (s, 3H), 3.46 (s, 3H);  $^{13}C$  NMR (125 MHz,  $CDCl_3$ )  $\delta$  172.41, 162.15, 143.03, 140.13, 137.77, 135.74, 129.56, 128.92, 128.11, 127.68, 126.96, 126.86, 126.80, 123.39, 122.39, 118.81, 84.59, 59.37, 52.54, 52.06; HRMS (EI)  $m/z$  calcd for  $C_{26}H_{23}NO_4$  ( $M^+$ ) 413.1627, found 413.1622.

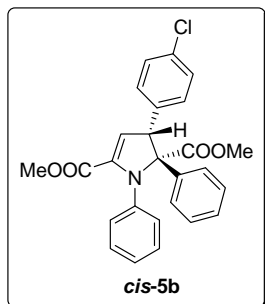

**(2S\*,3R\*)-dimethyl 3-(4-chlorophenyl)-2,3-dihydro-1,2-diphenyl-1H-pyrrole-2,5-dicarboxylate (*cis*-5b):**  $^1\text{H}$  NMR (500 MHz,  $\text{CDCl}_3$ )  $\delta$  7.66 (d,  $J = 7.5$  Hz, 2H), 7.40-7.37 (m, 2H), 7.34-7.26 (m, 5H), 7.08-7.05 (m, 2H), 6.93-6.91 (m, 1H), 6.72 (d,  $J = 7.5$  Hz, 2H), 5.84 (d,  $J = 3.5$  Hz, 1H), 4.47 (d,  $J = 3.5$  Hz, 1H), 3.76 (s, 3H), 2.87 (s, 3H);  $^{13}\text{C}$  NMR (125 MHz,  $\text{CDCl}_3$ )  $\delta$  169.23, 162.31, 143.45, 142.12, 140.83, 137.13, 133.60, 130.75, 128.29, 128.18, 127.91, 127.41, 123.10, 121.30, 114.57, 83.58, 62.36, 52.14, 51.13; HRMS (EI)  $m/z$  calcd for  $\text{C}_{26}\text{H}_{22}\text{ClNO}_4$  ( $\text{M}^+$ ) 447.1237, found 447.1239.

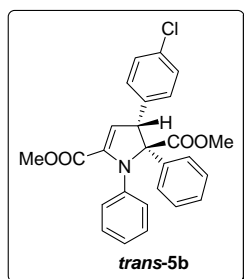

**(2R\*,3R\*)-dimethyl 3-(4-chlorophenyl)-2,3-dihydro-1,2-diphenyl-1H-pyrrole-2,5-dicarboxylate (*trans*-5b):**  $^1\text{H}$  NMR (500 MHz,  $\text{CDCl}_3$ )  $\delta$  7.11-7.08 (m, 2H), 7.03-6.90 (m, 8H), 6.84 (d,  $J = 7.8$  Hz, 2H), 6.69 (d,  $J = 7.8$  Hz, 2H), 5.90 (d,  $J = 2.5$  Hz, 1H), 5.47 (d,  $J = 2.5$  Hz, 1H), 3.74 (s, 3H), 3.46 (s, 3H);  $^{13}\text{C}$  NMR (125 MHz,  $\text{CDCl}_3$ )  $\delta$  172.29, 162.02, 142.83, 140.50, 136.45, 135.50, 132.81, 130.76, 128.82, 128.14, 128.06, 127.79, 127.15, 127.03, 123.63, 122.64, 117.90, 84.40, 58.52, 52.60, 52.10; HRMS (EI)  $m/z$  calcd for  $\text{C}_{26}\text{H}_{22}\text{ClNO}_4$  ( $\text{M}^+$ ) 447.1237, found 447.1239.

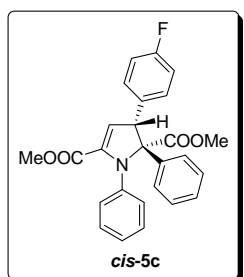

**(2S\*,3R\*)-dimethyl 3-(4-fluorophenyl)-2,3-dihydro-1,2-diphenyl-1H-pyrrole-2,5-dicarboxylate (*cis*-5c):**  $^1\text{H}$  NMR (500 MHz,  $\text{CDCl}_3$ )  $\delta$  7.67 (d,  $J = 7.5$  Hz, 2H), 7.40-7.37 (m, 2H), 7.32-7.28 (m, 3H), 7.08-6.99 (m, 4H), 6.91-6.88 (m, 1H), 6.72 (d,  $J = 7.5$  Hz, 2H), 5.84 (d,  $J = 3.0$  Hz, 1H), 4.47 (d,  $J = 3.0$  Hz, 1H), 3.75 (s, 3H), 2.85 (s, 3H);  $^{13}\text{C}$  NMR (125 MHz,  $\text{CDCl}_3$ )  $\delta$  169.30, 163.28, 162.36, 161.32, 143.54, 142.22, 140.61, 134.36, 134.34, 131.11, 131.04, 128.29, 128.18, 127.87, 127.45, 123.00, 121.19, 114.99, 114.89, 114.82, 83.57, 62.36, 52.12, 51.10; HRMS (EI)  $m/z$  calcd for  $\text{C}_{26}\text{H}_{22}\text{FNO}_4$  ( $\text{M}^+$ ) 431.1533, found 431.1534.

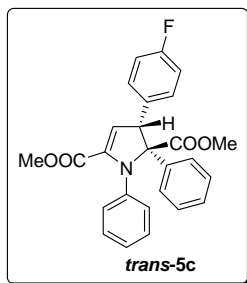

**(2R\*,3R\*)-dimethyl 3-(4-fluorophenyl)-2,3-dihydro-1,2-diphenyl-1H-pyrrole-2,5-dicarboxylate (*trans-5c*):**  $^1\text{H}$  NMR (500 MHz,  $\text{CDCl}_3$ )  $\delta$  7.11-7.09 (m, 2H), 7.02-6.92 (m, 6H), 6.86-6.84 (m, 2H), 6.73-6.66 (m, 4H), 5.93 (d,  $J = 3.0$  Hz, 1H), 5.50 (d,  $J = 3.0$  Hz, 1H), 3.74 (s, 3H), 3.46 (s, 3H);  $^{13}\text{C}$  NMR (125 MHz,  $\text{CDCl}_3$ )  $\delta$  172.34, 162.78, 162.06, 160.83, 142.87, 140.27, 135.61, 133.59, 133.57, 130.98, 130.91, 128.83, 128.12, 127.02, 126.96, 123.52, 122.52, 118.25, 114.59, 114.42, 84.41, 58.43, 52.56, 52.06; HRMS (EI)  $m/z$  calcd for  $\text{C}_{26}\text{H}_{22}\text{FNO}_4$  ( $\text{M}^+$ ) 431.1533, found 431.1534.

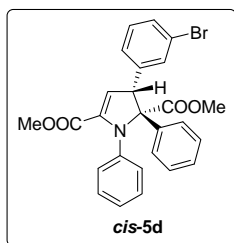

**(2S\*,3R\*)-dimethyl 3-(3-bromophenyl)-2,3-dihydro-1,2-diphenyl-1H-pyrrole-2,5-dicarboxylate (*cis-5d*):**  $^1\text{H}$  NMR (500 MHz,  $\text{CDCl}_3$ )  $\delta$  7.68 (d,  $J = 7.5$  Hz, 2H), 7.46 (s, 1H), 7.41-7.38 (m, 3H), 7.34-6.33 (m, 1H), 7.28-7.26 (m, 1H), 7.21-7.18 (m, 1H), 7.08-7.05 (m, 2H), 6.92-6.89 (m, 1H), 6.73 (d,  $J = 7.5$  Hz, 2H), 5.82 (d,  $J = 3.0$  Hz, 1H), 4.44 (d,  $J = 3.0$  Hz, 1H), 3.76 (s, 3H), 2.87 (s, 3H);  $^{13}\text{C}$  NMR (125 MHz,  $\text{CDCl}_3$ )  $\delta$  169.06, 162.29, 143.45, 142.21, 141.00, 132.57, 130.83, 129.62, 128.37, 128.22, 128.02, 127.95, 127.44, 123.11, 122.09, 121.24, 114.19, 83.62, 62.74, 52.18, 51.15; HRMS (EI)  $m/z$  calcd for  $\text{C}_{26}\text{H}_{22}\text{BrNO}_4$  ( $\text{M}^+$ ) 491.0732, found 491.0733.

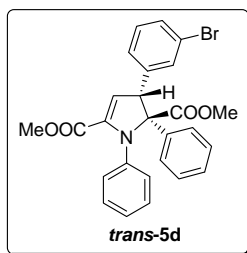

**(2R\*,3R\*)-dimethyl 3-(3-bromophenyl)-2,3-dihydro-1,2-diphenyl-1H-pyrrole-2,5-dicarboxylate (*trans-5d*):**  $^1\text{H}$  NMR (500 MHz,  $\text{CDCl}_3$ )  $\delta$  7.15-7.10 (m, 3H), 7.03-6.95 (m, 6H), 6.88-6.84 (m, 4H), 6.73-6.71 (m, 1H), 5.91 (d,  $J = 2.5$  Hz, 1H), 5.49 (d,  $J = 2.5$  Hz, 1H), 3.76 (s, 3H), 3.46 (s, 3H);  $^{13}\text{C}$  NMR (125 MHz,  $\text{CDCl}_3$ )  $\delta$  172.05, 161.94, 142.79, 140.64, 140.31, 135.51, 132.47, 129.97, 129.08, 128.71, 128.14, 128.08, 127.20, 126.99, 123.73, 122.71, 121.79, 117.53, 84.43, 58.80, 52.59, 52.11; HRMS (EI)  $m/z$  calcd for  $\text{C}_{26}\text{H}_{22}\text{BrNO}_4$  ( $\text{M}^+$ ) 491.0732, found 491.0733.

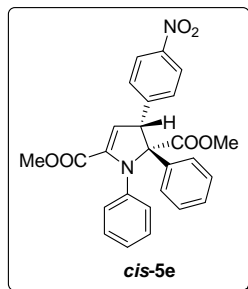

**(2S\*,3R\*)-dimethyl 2,3-dihydro-3-(4-nitrophenyl)-1,2-diphenyl-1H-pyrrole-2,5-dicarboxylate (*cis-5e*):**  $^1\text{H}$  NMR (500 MHz,  $\text{CDCl}_3$ )  $\delta$  8.18-8.16 (m, 2H), 7.61 (d,  $J = 7.5$  Hz, 2H), 7.51-7.49 (m, 2H), 7.39-7.32 (m, 3H), 7.07-7.04 (m, 2H), 6.94-6.92 (m, 1H), 6.73 (d,  $J = 7.5$  Hz, 2H), 5.83 (d,  $J = 3.0$  Hz, 1H), 4.59 (d,  $J = 3.0$  Hz, 1H), 3.74 (s, 3H), 2.84 (s, 3H);  $^{13}\text{C}$  NMR (125 MHz,  $\text{CDCl}_3$ )  $\delta$  169.04, 162.10, 147.38, 146.32, 143.03, 141.75, 141.61, 130.28, 128.43, 128.27, 128.20, 127.35, 123.68, 123.21, 121.93, 113.33, 83.78, 62.13, 52.25, 51.25; HRMS (EI)  $m/z$  calcd for  $\text{C}_{26}\text{H}_{22}\text{N}_2\text{O}_6$  ( $\text{M}^+$ ) 458.1478, found 458.1480.

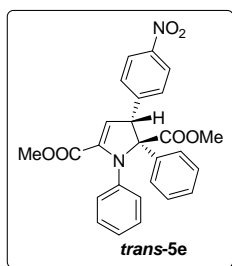

**(2R\*,3R\*)-dimethyl 2,3-dihydro-3-(4-nitrophenyl)-1,2-diphenyl-1H-pyrrole-2,5-dicarboxylate (*trans-5e*):**  $^1\text{H}$  NMR (500 MHz,  $\text{CDCl}_3$ )  $\delta$  8.06 (d,  $J = 9.0$  Hz, 2H), 7.93-7.91 (m, 2H), 7.30-7.26 (m, 3H), 7.13-7.08 (m, 4H), 6.77-6.74 (m, 1H), 6.43 (d,  $J = 9.0$  Hz, 2H), 6.17 (d,  $J = 2.0$  Hz, 1H), 5.45 (d,  $J = 2.0$  Hz, 1H), 3.89 (s, 3H), 3.60 (s, 3H);  $^{13}\text{C}$  NMR (125 MHz,  $\text{CDCl}_3$ )  $\delta$  171.18, 171.11, 147.70, 145.68, 143.57, 139.41, 137.02, 129.30, 129.05, 128.53, 128.16, 127.95, 125.82, 123.25, 118.73, 113.67, 81.61, 69.08, 52.87, 52.81; HRMS (EI)  $m/z$  calcd for  $\text{C}_{26}\text{H}_{22}\text{N}_2\text{O}_6$  ( $\text{M}^+$ ) 458.1478, found 458.1480.

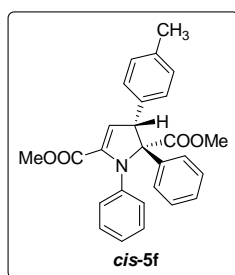

**(2S\*,3R\*)-dimethyl 2,3-dihydro-1,2-diphenyl-3-p-tolyl-1H-pyrrole-2,5-dicarboxylate (*cis-5f*):**  $^1\text{H}$  NMR (500 MHz,  $\text{CDCl}_3$ )  $\delta$  7.71 (d,  $J = 7.5$  Hz, 2H), 7.41-7.38 (m, 2H), 7.34-7.32 (m, 1H), 7.23-7.21 (m, 2H), 7.14-7.12 (m, 2H), 7.08-7.05 (m, 2H), 6.91-6.89 (m, 1H), 6.73 (d,  $J = 7.5$  Hz, 2H), 5.88 (d,  $J = 3.0$  Hz, 1H), 4.47 (1H, d,  $J = 3.0$  Hz), 3.76 (s, 3H), 2.82 (s, 3H), 2.32 (s, 3H);  $^{13}\text{C}$  NMR (125 MHz,  $\text{CDCl}_3$ )  $\delta$  169.43, 162.52, 143.82, 142.57, 140.27, 137.42, 135.46, 129.37, 128.72, 128.24, 128.14, 127.74, 127.54, 122.76, 121.05, 115.68, 83.64, 63.05, 52.08, 51.00, 21.08; HRMS (EI)  $m/z$  calcd for  $\text{C}_{27}\text{H}_{25}\text{NO}_4$  ( $\text{M}^+$ ) 427.1784, found 427.1785.

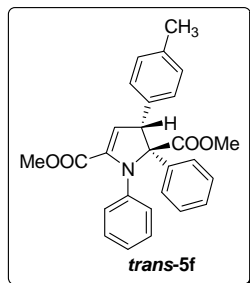

**(2R\*,3R\*)-dimethyl 2,3-dihydro-1,2-diphenyl-3-p-tolyl-1H-pyrrole-2,5-dicarboxylate (*trans*-5f):**  $^1\text{H}$  NMR (500 MHz,  $\text{CDCl}_3$ )  $\delta$  7.11-7.08 (m, 2H), 7.01-6.93 (m, 6H), 6.83-6.79 (m, 4H), 6.65-6.63 (m, 2H), 5.94 (d,  $J = 2.5$  Hz, 1H), 5.47 (d,  $J = 2.5$  Hz, 1H), 3.75 (s, 3H), 3.47 (s, 3H), 2.18 (s, 3H);  $^{13}\text{C}$  NMR (125 MHz,  $\text{CDCl}_3$ )  $\delta$  172.51, 162.20, 143.08, 139.88, 136.65, 135.73, 134.57, 129.41, 128.99, 128.37, 128.10, 126.84, 126.77, 123.26, 122.24, 119.24, 84.59, 59.11, 52.52, 52.05, 20.96; HRMS (EI)  $m/z$  calcd for  $\text{C}_{27}\text{H}_{25}\text{NO}_4$  ( $\text{M}^+$ ) 427.1784, found 427.1785.

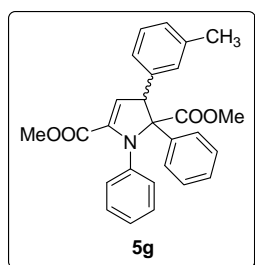

**(2S\*,3R\*) and (2R\*,3R\*)-dimethyl 2,3-dihydro-1,2-diphenyl-3-m-tolyl-1H-pyrrole-2,5-dicarboxylate (*cis*-5g+*trans*-5g)** (mixture of diastereomers):  $^1\text{H}$  NMR (500 MHz,  $\text{CDCl}_3$ )  $\delta$  7.71 (d,  $J = 7.5$  Hz, 2H), 7.39-7.38 (m, 2H), 7.37-7.35 (m, 1H), 7.20-7.18 (m, 1H), 7.13-7.04 (m, 6H), 6.99-6.94 (m, 6H), 6.89-6.83 (m, 6H), 6.73 (d,  $J = 8.5$  Hz, 2H), 6.59 (d,  $J = 7.5$  Hz, 1H), 6.50 (s, 1H), 5.94 (d,  $J = 2.5$  Hz, 1H, *trans*-5g), 5.87 (d,  $J = 3.0$  Hz, 1H, *cis*-5g), 5.49 (d,  $J = 2.5$  Hz, 1H, *trans*-5g), 4.45 (d,  $J = 3.0$  Hz, 1H, *cis*-5g), 3.76 (s, 3H, *trans*-5g), 3.76 (s, 3H, *cis*-5g), 3.44 (s, 3H, *trans*-5g), 2.80 (s, 3H, *cis*-5g), 2.34 (s, 3H, *cis*-5g), 2.08 (s, 3H, *trans*-5g);  $^{13}\text{C}$  NMR (125 MHz,  $\text{CDCl}_3$ )  $\delta$  172.34, 169.36, 162.52, 162.19, 143.11, 139.97, 137.58, 137.26, 130.35, 130.11, 128.91, 128.25, 128.14, 128.12, 127.75, 127.65, 127.55, 127.52, 126.86, 126.69, 126.60, 123.35, 122.75, 122.30, 121.01, 119.12, 115.58, 84.65, 83.68, 63.35, 59.45, 52.49, 52.09, 52.05, 50.96, 21.33, 21.00; HRMS (EI)  $m/z$  calcd for  $\text{C}_{27}\text{H}_{25}\text{NO}_4$  ( $\text{M}^+$ ) 427.1784, found 427.1789.

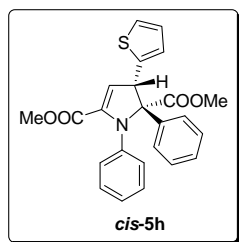

**(2S\*,3S\*)-dimethyl 2,3-dihydro-1,2-diphenyl-3-(thiophen-2-yl)-1H-pyrrole-2,5-dicarboxylate (*cis*-5h):**  $^1\text{H}$  NMR (500 MHz,  $\text{CDCl}_3$ )  $\delta$  7.75 (d,  $J = 7.5$  Hz, 2H), 7.43-7.40 (m, 2H), 7.36-7.34 (m, 1H), 7.26-7.24 (m, 1H), 7.10-7.07 (m, 2H), 7.00-6.97 (m, 2H), 6.92-6.89 (m, 1H), 6.73 (d,  $J = 7.5$  Hz, 2H), 5.89 (d,  $J = 3.0$  Hz, 1H), 4.47 (d,  $J = 3.0$  Hz, 1H), 3.77 (s, 3H), 2.93 (s, 3H);  $^{13}\text{C}$  NMR (125 MHz,  $\text{CDCl}_3$ )  $\delta$  168.88, 162.30, 143.72, 142.25, 142.11, 140.21, 128.30, 128.21, 127.87, 127.55, 126.74,



126.59, 125.53, 122.78, 120.61, 114.39, 83.74, 58.32, 52.15, 51.30; HRMS (EI)  $m/z$  calcd for  $C_{24}H_{21}NO_4S$  ( $M^+$ ) 419.1191, found 419.1192.

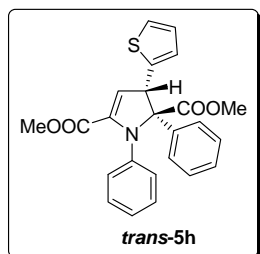

**(2R\*,3S\*)-dimethyl 2,3-dihydro-1,2-diphenyl-3-(thiophen-2-yl)-1H-pyrrole-2,5-dicarboxylate (*trans*-5h):**  $^1H$  NMR (500 MHz,  $CDCl_3$ )  $\delta$  7.12-7.08 (m, 3H), 7.07-6.95 (m, 6H), 6.86-6.84 (m, 2H), 6.71-6.70 (m, 1H), 6.51-6.50 (m, 1H), 6.00 (d,  $J = 3.0$  Hz, 1H), 5.66 (d,  $J = 3.0$  Hz, 1H), 3.76 (s, 3H), 3.56 (s, 3H);  $^{13}C$  NMR (125 MHz,  $CDCl_3$ )  $\delta$  172.45, 162.05, 142.66, 141.28, 140.17, 135.00, 128.55, 128.09, 127.21, 127.13, 126.98, 126.36, 125.41, 123.48, 122.68, 117.67, 84.31, 53.86, 52.71, 52.12; HRMS (EI)  $m/z$  calcd for  $C_{24}H_{21}NO_4S$  ( $M^+$ ) 419.1191, found 419.1192.

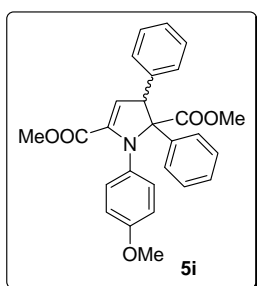

**(2S\*,3R\*) and (2R\*,3R\*)-dimethyl 2,3-dihydro-1-(4-methoxyphenyl)-2,3-diphenyl-1H-pyrrole-2,5-dicarboxylate (*cis*-5i+*trans*-5i)** (mixture of diastereomers):  $^1H$  NMR (500 MHz,  $CDCl_3$ )  $\delta$  7.52 (d,  $J = 7.5$  Hz, 2H), 7.34-7.28 (m, 8H), 7.02-6.97 (m, 8H), 6.92 (d,  $J = 8.5$  Hz, 2H), 6.80 (d,  $J = 7.0$  Hz, 2H), 6.75 (d,  $J = 8.5$  Hz, 2H), 6.70 (d,  $J = 8.5$  Hz, 2H), 6.59 (d,  $J = 8.5$  Hz, 2H), 5.94 (d,  $J = 2.5$  Hz, 1H, *trans*-5i), 5.90 (d,  $J = 2.5$  Hz, 1H, *cis*-5i), 5.62 (d,  $J = 2.5$  Hz, 1H, *trans*-5i), 4.66 (d,  $J = 2.5$  Hz, 1H, *cis*-5i), 3.75 (s, 3H, *trans*-5i), 3.72 (s, 3H, *trans*-5i), 3.70 (s, 3H, *cis*-5i), 3.69 (s, 3H, *cis*-5i), 3.42 (s, 3H, *trans*-5i), 2.92 (s, 3H, *cis*-5i);  $^{13}C$  NMR (125 MHz,  $CDCl_3$ )  $\delta$  172.23, 162.14, 156.47, 140.59, 138.10, 136.58, 136.47, 129.57, 129.39, 128.79, 128.12, 128.06, 127.62, 126.83, 126.78, 125.15, 125.08, 118.38, 113.45, 113.26, 84.47, 58.94, 55.27, 52.45, 51.99; HRMS (EI)  $m/z$  calcd for  $C_{27}H_{25}NO_5$  ( $M^+$ ) 443.1733, found 443.1732.

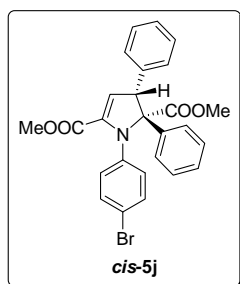

**(2S\*,3R\*)-dimethyl 1-(4-bromophenyl)-2,3-dihydro-2,3-diphenyl-1H-pyrrole-2,5-dicarboxylate (*cis*-5j):**  $^1H$  NMR (500 MHz,  $CDCl_3$ )  $\delta$  7.64 (d,  $J = 7.5$  Hz, 2H), 7.40-7.37 (m, 2H), 7.34-7.30 (m, 5H), 7.27-7.24 (m, 1H), 7.17-7.15 (m, 2H), 6.61 (d,  $J = 7.5$  Hz, 2H), 5.93 (d,  $J = 3.0$  Hz, 1H), 4.50 (d,  $J = 3.0$  Hz, 1H), 3.76 (s, 3H), 2.83

(s, 3H);  $^{13}\text{C}$  NMR (125 MHz,  $\text{CDCl}_3$ )  $\delta$  169.24, 162.07, 142.76, 141.83, 139.99, 138.30, 131.09, 129.38, 128.39, 128.12, 128.03, 127.85, 127.41, 123.07, 116.37, 115.81, 83.69, 63.12, 52.20, 51.20; HRMS (EI)  $m/z$  calcd for  $\text{C}_{26}\text{H}_{22}\text{BrNO}_4$  ( $\text{M}^+$ ) 491.0732, found 491.0734.

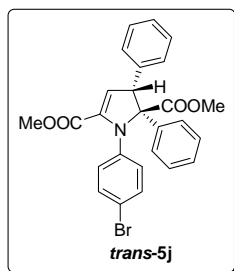

**(2R\*,3R\*)-dimethyl 1-(4-bromophenyl)-2,3-dihydro-2,3-diphenyl-1H-pyrrole-2,5-dicarboxylate (*trans*-5j):**  $^1\text{H}$  NMR (500 MHz,  $\text{CDCl}_3$ )  $\delta$  7.19 (d,  $J = 8.5$  Hz, 2H), 7.05-6.93 (m, 6H), 6.85 (d,  $J = 7.5$  Hz, 2H), 6.75 (d,  $J = 7.5$  Hz, 2H), 6.69 (d,  $J = 8.5$  Hz, 2H), 6.02 (d,  $J = 3.0$  Hz, 1H), 5.45 (d,  $J = 3.0$  Hz, 1H), 3.78 (s, 3H), 3.57 (s, 3H);  $^{13}\text{C}$  NMR (125 MHz,  $\text{CDCl}_3$ )  $\delta$  172.42, 161.83, 141.97, 139.57, 137.41, 135.00, 131.07, 129.52, 128.85, 127.77, 127.12, 127.09, 126.96, 123.76, 119.53, 116.01, 84.56, 59.24, 52.78, 52.20; HRMS (EI)  $m/z$  calcd for  $\text{C}_{26}\text{H}_{22}\text{BrNO}_4$  ( $\text{M}^+$ ) 491.0732, found 491.0734.

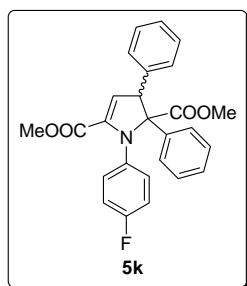

**(2S\*,3R\*) and (2R\*,3R\*)-dimethyl 1-(4-fluorophenyl)-2,3-dihydro-2,3-diphenyl-1H-pyrrole-2,5-dicarboxylate (*cis*-5k+*trans*-5k)** (mixture of diastereomers):  $^1\text{H}$  NMR (500 MHz,  $\text{CDCl}_3$ )  $\delta$  7.49 (d,  $J = 7.5$  Hz, 2H), 7.32-7.28 (m, 8H), 7.01-6.94 (m, 6H), 6.92-6.86 (m, 4H), 6.82-6.72 (m, 8H), 5.98 (d,  $J = 2.5$  Hz, 1H, *trans*-5k), 5.93 (d,  $J = 3.0$  Hz, 1H, *cis*-5k), 5.55 (d,  $J = 2.5$  Hz, 1H, *trans*-5k), 4.63 (d,  $J = 3.0$  Hz, 1H, *cis*-5k), 3.75 (s, 3H, *trans*-5k), 3.70 (s, 3H, *cis*-5k), 3.47 (s, 3H, *trans*-5k), 2.89 (s, 3H, *cis*-5k);  $^{13}\text{C}$  NMR (125 MHz,  $\text{CDCl}_3$ )  $\delta$  172.25, 169.82, 162.16, 161.90, 160.38, 158.45, 141.63, 140.07, 137.72, 135.86, 129.53, 129.34, 128.79, 128.23, 128.12, 127.77, 127.70, 127.47, 126.97, 126.95, 126.90, 124.88, 124.81, 124.78, 124.72, 119.08, 114.94, 114.80, 114.76, 84.55, 84.01, 61.95, 58.99, 52.55, 52.06, 51.11; HRMS (EI)  $m/z$  calcd for  $\text{C}_{26}\text{H}_{22}\text{FNO}_4$  ( $\text{M}^+$ ) 431.1533, found 431.1532.

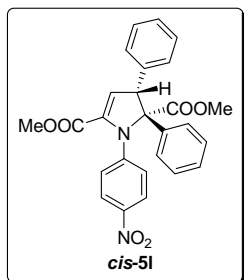

**(2S\*,3R\*)-dimethyl 2,3-dihydro-1-(4-nitrophenyl)-2,3-diphenyl-1H-pyrrole-2,5-dicarboxylate (cis-5l):**  $^1\text{H}$  NMR (500 MHz,  $\text{CDCl}_3$ )  $\delta$  8.00 (d,  $J = 9.0$  Hz, 2H), 7.80-7.78 (m, 2H), 7.47-7.44 (m, 2H), 7.40-7.24 (m, 6H), 6.66 (d,  $J = 9.0$  Hz, 2H), 6.08 (d,  $J = 3.0$  Hz, 1H), 4.42 (d,  $J = 3.0$  Hz, 1H), 3.86 (s, 3H), 2.76 (s, 3H);  $^{13}\text{C}$  NMR (125 MHz,  $\text{CDCl}_3$ )  $\delta$  168.19, 161.44, 149.10, 141.49, 140.86, 138.41, 137.13, 129.39, 128.73, 128.33, 128.25, 127.17, 124.42, 119.49, 118.20, 83.47, 64.52, 52.57, 51.57; HRMS (EI)  $m/z$  calcd for  $\text{C}_{26}\text{H}_{22}\text{N}_2\text{O}_6$  ( $\text{M}^+$ ) 458.1478, found 458.1481.

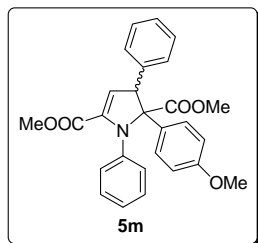

**(2S\*,3R\*) and (2R\*,3R\*)-dimethyl 2,3-dihydro-1-(4-methoxyphenyl)-2,3-diphenyl-1H-pyrrole-2,5-dicarboxylate (cis-5m+trans-5m)** (mixture of diastereomers):  $^1\text{H}$  NMR (500 MHz,  $\text{CDCl}_3$ )  $\delta$  7.59 (d,  $J = 7.5$  Hz, 2H), 7.31-7.29 (m, 4H), 7.11-7.08 (m, 2H), 7.06-6.99 (m, 5H), 6.94-6.90 (m, 5H), 6.82-6.80 (m, 4H), 6.77 (d,  $J = 8.5$  Hz, 2H), 6.72 (d,  $J = 7.5$  Hz, 2H), 6.49 (d,  $J = 8.5$  Hz, 2H), 5.95 (d,  $J = 2.5$  Hz, 1H, *trans*-5m), 5.87 (d,  $J = 2.5$  Hz, 1H, *cis*-5m), 5.46 (d,  $J = 2.5$  Hz, 1H, *trans*-5m), 4.45 (d,  $J = 2.5$  Hz, 1H, *cis*-5m), 3.81 (s, 3H, *cis*-5m), 3.75 (s, 3H, *trans*-5m), 3.74 (s, 3H, *cis*-5m), 3.66 (s, 3H, *trans*-5m), 3.48 (s, 3H, *trans*-5m), 2.77 (s, 3H, *cis*-5m);  $^{13}\text{C}$  NMR (125 MHz,  $\text{CDCl}_3$ )  $\delta$  172.23, 162.14, 156.47, 140.59, 138.10, 136.58, 136.47, 129.57, 129.39, 128.79, 128.12, 128.06, 127.62, 126.83, 126.78, 125.15, 125.08, 118.38, 113.45, 113.26, 84.47, 58.94, 55.27, 52.45, 51.99; HRMS (EI)  $m/z$  calcd for  $\text{C}_{27}\text{H}_{25}\text{NO}_5$  ( $\text{M}^+$ ) 443.1733, found 443.1732.

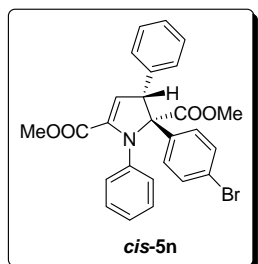

**(2S\*,3R\*)-dimethyl 2-(4-bromophenyl)-2,3-diphenyl-1,3-diphenyl-1H-pyrrole-2,5-dicarboxylate (cis-5n):**  $^1\text{H}$  NMR (500 MHz,  $\text{CDCl}_3$ )  $\delta$  7.63 (d,  $J = 8.5$  Hz, 2H), 7.53 (d,  $J = 8.5$  Hz, 2H), 7.33-7.24 (m, 5H), 7.09-7.06 (m, 2H), 6.91-6.88 (m, 1H), 6.69-6.67 (m, 2H), 5.86 (d,  $J = 3.0$  Hz, 1H), 4.37 (d,  $J = 3.0$  Hz, 1H), 3.77 (s, 3H), 2.75 (s, 3H);  $^{13}\text{C}$  NMR (125 MHz,  $\text{CDCl}_3$ )  $\delta$  168.85, 162.31, 143.50, 141.72, 140.33, 138.18, 131.42, 129.41, 129.40, 128.31, 128.11, 127.88, 122.91, 122.00, 120.56, 115.01,

83.22, 63.58, 52.20, 51.11; HRMS (EI)  $m/z$  calcd for  $C_{26}H_{22}BrNO_4$  ( $M^+$ ) 491.0732, found 491.0733.

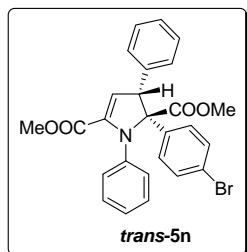

**(2R\*,3R\*)-dimethyl 2-(4-bromophenyl)-2,3-dihydro-1,3-diphenyl-1H-pyrrole-2,5-dicarboxylate (*trans*-5n):**  $^1H$  NMR (500 MHz,  $CDCl_3$ )  $\delta$  7.13-6.96 (m, 8H), 6.84 (d,  $J = 8.5$  Hz, 2H), 6.80-6.78 (m, 2H), 6.76 (d,  $J = 8.5$  Hz, 2H), 5.94 (d,  $J = 3.0$  Hz, 1H), 5.54 (d,  $J = 3.0$  Hz, 1H), 3.76 (s, 3H), 3.43 (s, 3H);  $^{13}C$  NMR (125 MHz,  $CDCl_3$ )  $\delta$  171.78, 161.97, 142.83, 140.04, 137.24, 135.12, 130.64, 129.93, 129.48, 128.26, 127.94, 127.36, 123.62, 122.12, 121.24, 118.88, 84.18, 59.58, 52.64, 52.13; HRMS (EI)  $m/z$  calcd for  $C_{26}H_{22}BrNO_4$  ( $M^+$ ) 491.0732, found 491.0733.

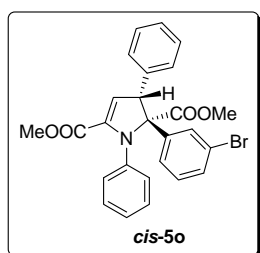

**(2S\*,3R\*)-dimethyl 2-(3-bromophenyl)-2,3-dihydro-1,3-diphenyl-1H-pyrrole-2,5-dicarboxylate (*cis*-5o):**  $^1H$  NMR (500 MHz,  $CDCl_3$ )  $\delta$  7.93 (s, 1H), 7.65 (d,  $J = 8.0$  Hz, 1H), 7.48 (d,  $J = 8.0$  Hz, 1H), 7.35-7.28 (m, 4H), 7.27-7.25 (m, 2H), 7.11-7.08 (m, 2H), 6.93-6.90 (m, 1H), 6.72-6.70 (m, 2H), 5.89 (d,  $J = 3.0$  Hz, 1H), 4.42 (d,  $J = 3.0$  Hz, 1H), 3.78 (s, 3H), 2.78 (s, 3H);  $^{13}C$  NMR (125 MHz,  $CDCl_3$ )  $\delta$  167.63, 161.11, 143.68, 142.32, 139.22, 136.97, 129.75, 129.54, 128.63, 128.26, 127.14, 126.95, 126.72, 125.04, 121.85, 121.30, 119.60, 113.95, 82.03, 62.23, 51.01, 49.96; HRMS (EI)  $m/z$  calcd for  $C_{26}H_{22}BrNO_4$  ( $M^+$ ) 491.0732, found 491.0732.

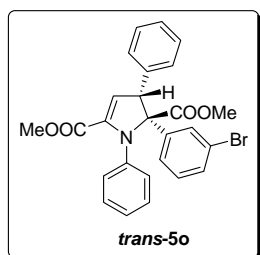

**(2R\*,3R\*)-dimethyl 2-(3-bromophenyl)-2,3-dihydro-1,3-diphenyl-1H-pyrrole-2,5-dicarboxylate (*trans*-5o):**  $^1H$  NMR (500 MHz,  $CDCl_3$ )  $\delta$  7.16-7.04 (m, 7H), 7.01-6.98 (m, 2H), 6.88-6.83 (m, 3H), 6.79-6.77 (m, 2H), 5.97 (s, 1H), 5.56 (s, 1H), 3.77 (s, 3H), 3.43 (s, 3H);  $^{13}C$  NMR (125 MHz,  $CDCl_3$ )  $\delta$  170.37, 160.77, 141.75, 138.99, 137.36, 136.07, 130.99, 128.79, 128.24, 127.17, 127.12, 126.70, 126.28, 126.26, 122.65, 121.20, 120.07, 117.73, 82.95, 58.62, 51.48, 50.96; HRMS (EI)  $m/z$  calcd for  $C_{26}H_{22}BrNO_4$  ( $M^+$ ) 491.0732, found 491.0732.

Single-crystal X-ray structure determinations were performed on a Bruker SMART APEX II diffractometer using graphite-monochromated Mo-K $\alpha$  radiation ( $\lambda = 0.71073 \text{ \AA}$ ). Cell parameters were retrieved using APEX II software and refined using SAINT on all observed reflections. Data reduction was performed using the SAINT software. Scaling and absorption corrections were applied using SADABS multi-scan technique supplied by George Sheldrick.<sup>4</sup> The structures were solved by direct methods and refined by full-matrix least-squares on  $F^2$  with anisotropic displacement parameters for non-H atoms using SHELX-97.<sup>5</sup>

### Crystal data of 4a

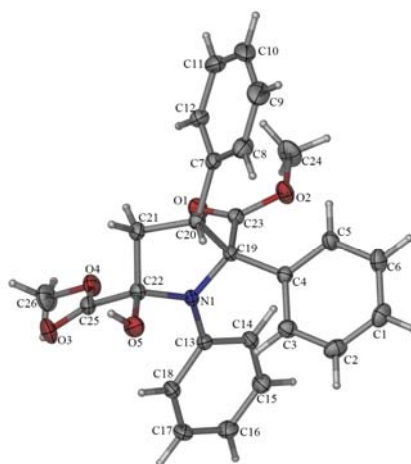

|                             |                                                                                                                                                                                                         |
|-----------------------------|---------------------------------------------------------------------------------------------------------------------------------------------------------------------------------------------------------|
| Identification code         | zyg-1                                                                                                                                                                                                   |
| Empirical formula           | C <sub>26</sub> H <sub>25</sub> NO <sub>5</sub>                                                                                                                                                         |
| Formula weight              | 431.47                                                                                                                                                                                                  |
| Temperature                 | 296(2) K                                                                                                                                                                                                |
| Wavelength                  | 0.71073 $\text{\AA}$                                                                                                                                                                                    |
| Crystal system, space group | Triclinic, $P\bar{1}$                                                                                                                                                                                   |
| Unit cell dimensions        | $a = 9.0431(2) \text{ \AA}$ $\alpha = 104.7420(10) \text{ deg.}$<br>$b = 9.1987(2) \text{ \AA}$ $\beta = 98.0810(10) \text{ deg.}$<br>$c = 14.3311(2) \text{ \AA}$ $\gamma = 101.1600(10) \text{ deg.}$ |
| Volume                      | $1108.22(4) \text{ \AA}^3$                                                                                                                                                                              |

|                                   |                                             |
|-----------------------------------|---------------------------------------------|
| Z, Calculated density             | 2, 1.293 Mg/m <sup>3</sup>                  |
| Absorption coefficient            | 0.090 mm <sup>-1</sup>                      |
| F(000)                            | 456                                         |
| Crystal size                      | 0.628 x 0.624 x 0.516 mm                    |
| Theta range for data collection   | 1.50 to 25.01 deg.                          |
| Limiting indices                  | -10<=h<=10, -10<=k<=10, -17<=l<=17          |
| Reflections collected / unique    | 15997 / 3889 [R(int) = 0.0181]              |
| Completeness to theta = 25.01     | 99.7 %                                      |
| Absorption correction             | Semi-empirical from equivalents             |
| Max. and min. transmission        | 1 and 0.897856                              |
| Refinement method                 | Full-matrix least-squares on F <sup>2</sup> |
| Data / restraints / parameters    | 3889 / 0 / 290                              |
| Goodness-of-fit on F <sup>2</sup> | 1.031                                       |
| Final R indices [I>2sigma(I)]     | R1 = 0.0375, wR2 = 0.1014                   |
| R indices (all data)              | R1 = 0.0411, wR2 = 0.1062                   |
| Extinction coefficient            | 0.034(3)                                    |
| Largest diff. peak and hole       | 0.353 and -0.352 e.A <sup>-3</sup>          |

### Crystal data of 4c

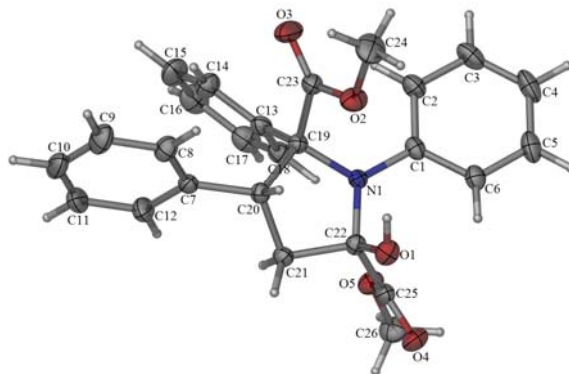

|                     |                                                 |
|---------------------|-------------------------------------------------|
| Identification code | zyg-2                                           |
| Empirical formula   | C <sub>26</sub> H <sub>25</sub> NO <sub>5</sub> |
| Formula weight      | 431.47                                          |

|                                      |                                                                                                                                 |
|--------------------------------------|---------------------------------------------------------------------------------------------------------------------------------|
| Temperature                          | 296(2) K                                                                                                                        |
| Wavelength                           | 0.71073 Å                                                                                                                       |
| Crystal system, space group          | Monoclinic, $P2_1/n$                                                                                                            |
| Unit cell dimensions                 | $a = 13.6991(6)$ Å $\alpha = 90$ deg.<br>$b = 9.8616(5)$ Å $\beta = 105.5260(10)$ deg.<br>$c = 17.5991(8)$ Å $\gamma = 90$ deg. |
| Volume                               | $2290.79(19)$ Å <sup>3</sup>                                                                                                    |
| Z, Calculated density                | 4, 1.251 Mg/m <sup>3</sup>                                                                                                      |
| Absorption coefficient               | $0.087$ mm <sup>-1</sup>                                                                                                        |
| F(000)                               | 912                                                                                                                             |
| Crystal size                         | 0.354 x 0.340 x 0.255 mm                                                                                                        |
| Theta range for data collection      | 1.68 to 25.01 deg.                                                                                                              |
| Limiting indices                     | $-16 \leq h \leq 16$ , $-11 \leq k \leq 11$ , $-19 \leq l \leq 20$                                                              |
| Reflections collected / unique       | 26067 / 4025 [ $R(\text{int}) = 0.0213$ ]                                                                                       |
| Completeness to $\theta = 25.01$     | 99.9 %                                                                                                                          |
| Absorption correction                | Semi-empirical from equivalents                                                                                                 |
| Max. and min. transmission           | 1 and 0.839748                                                                                                                  |
| Refinement method                    | Full-matrix least-squares on $F^2$                                                                                              |
| Data / restraints / parameters       | 4025 / 0 / 289                                                                                                                  |
| Goodness-of-fit on $F^2$             | 1.025                                                                                                                           |
| Final R indices [ $I > 2\sigma(I)$ ] | $R1 = 0.0426$ , $wR2 = 0.1168$                                                                                                  |
| R indices (all data)                 | $R1 = 0.0506$ , $wR2 = 0.1257$                                                                                                  |
| Largest diff. peak and hole          | 0.479 and -0.430 e.Å <sup>-3</sup>                                                                                              |

### Notes and References:

- 1 Y.-C. Wu, L. Liu, H.-J. Li, D. Wang and Y.-J. Chen, *J. Org. Chem.*, 2006, **71**, 6592.
- 2 T. Vaijayanthi and A. Chadha, *Tetrahedron: Asymmetry*, 2007, **18**, 1077.
- 3 M. P. Doyle, M. A. Mckerverey and T. Ye, *Modern Catalytic Methods for Organic Synthesis with Diazo Compounds*; Wiley: New York, 1998.
- 4 SAINT V 7.34 Software for the Integration of CCD Detector System Bruker Analytical X-ray Systems, Madison, WI, 2001.
- 5 G. M. Sheldrick, SHELX-97; Bruker Analytical X-Ray Systems, Inc.: Madison, WI, 1997.



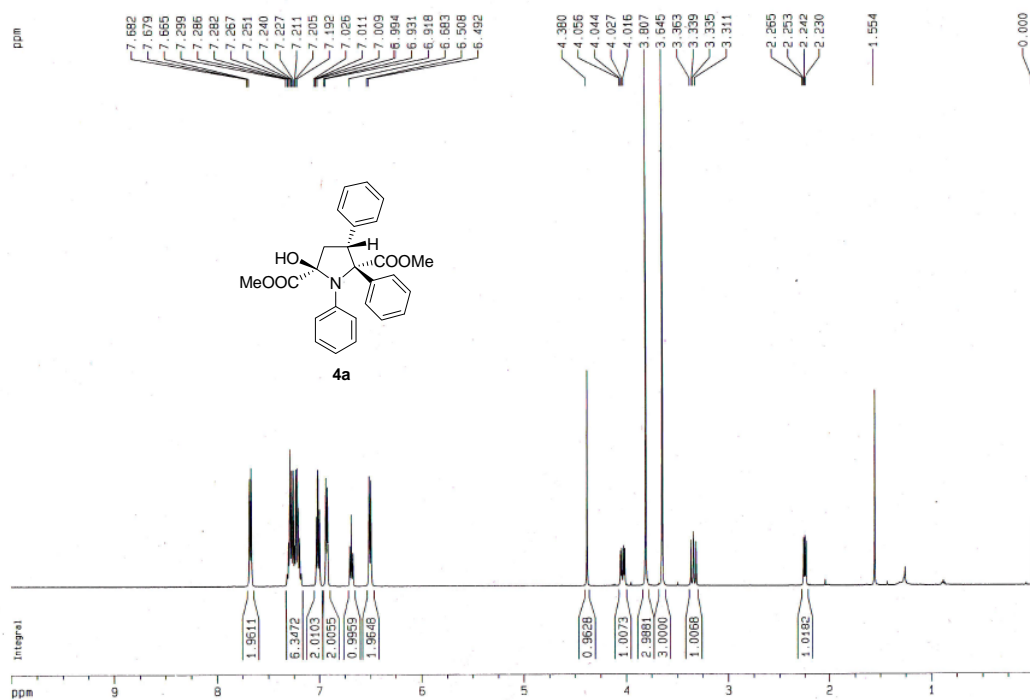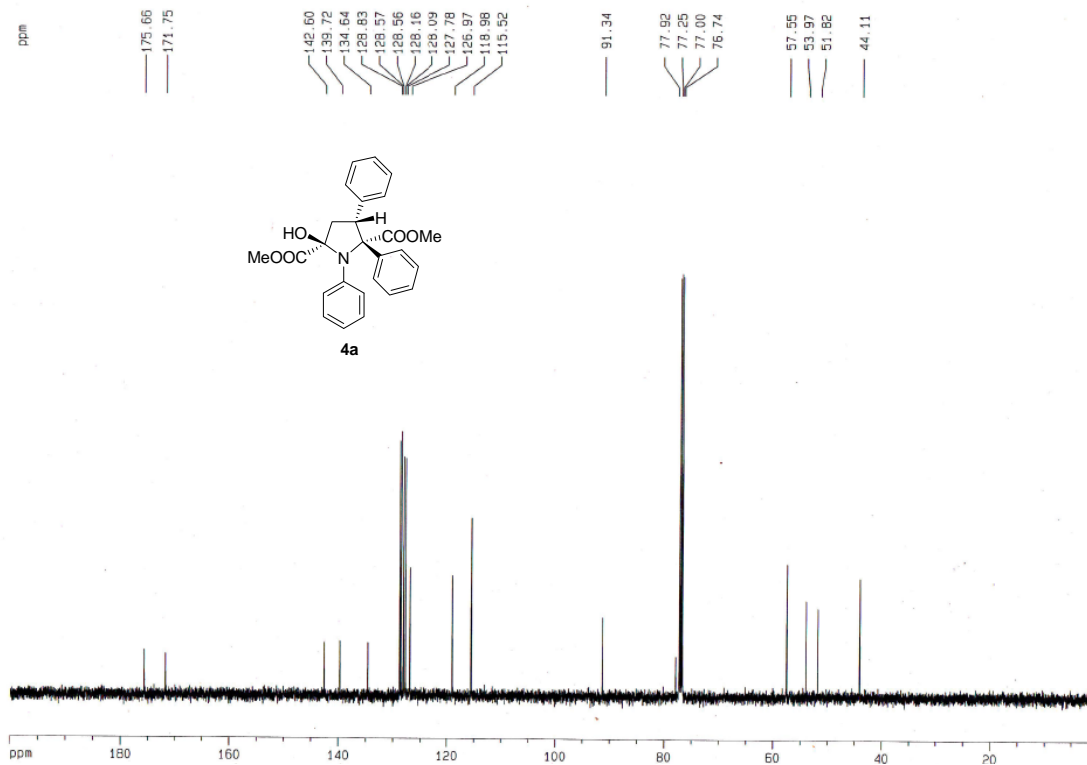

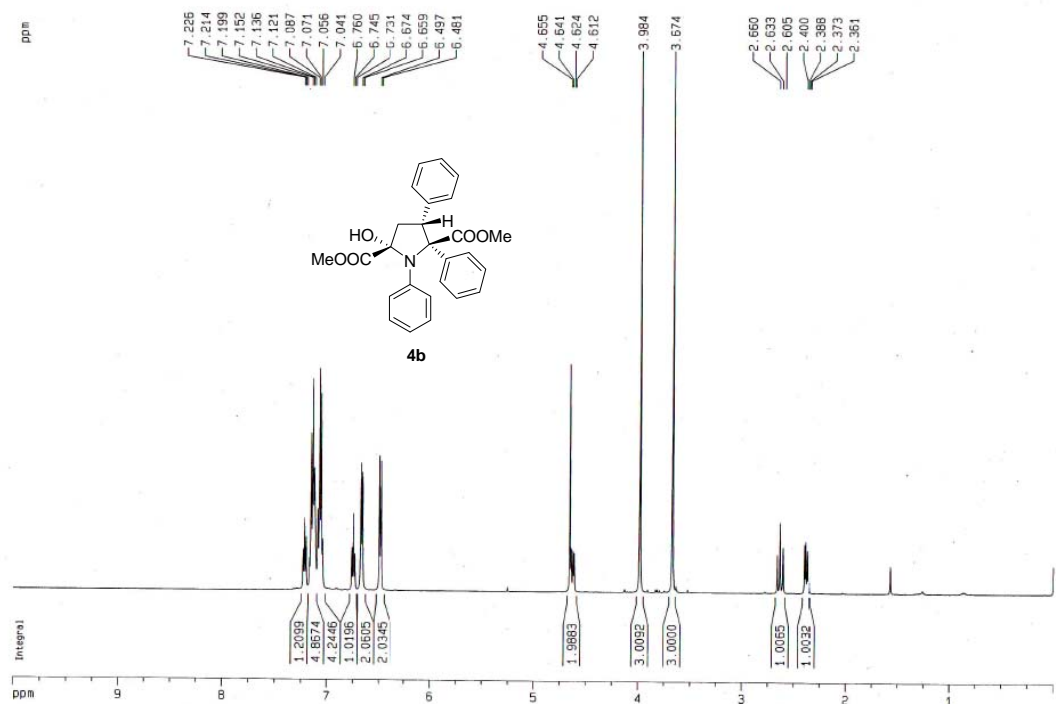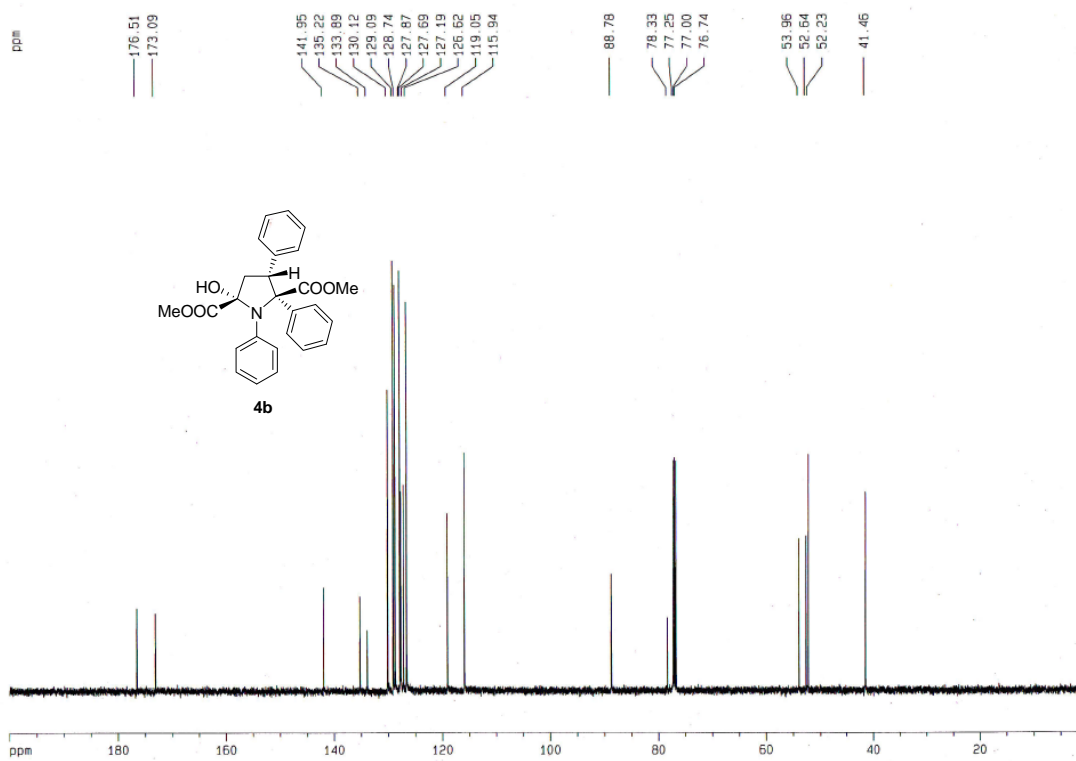

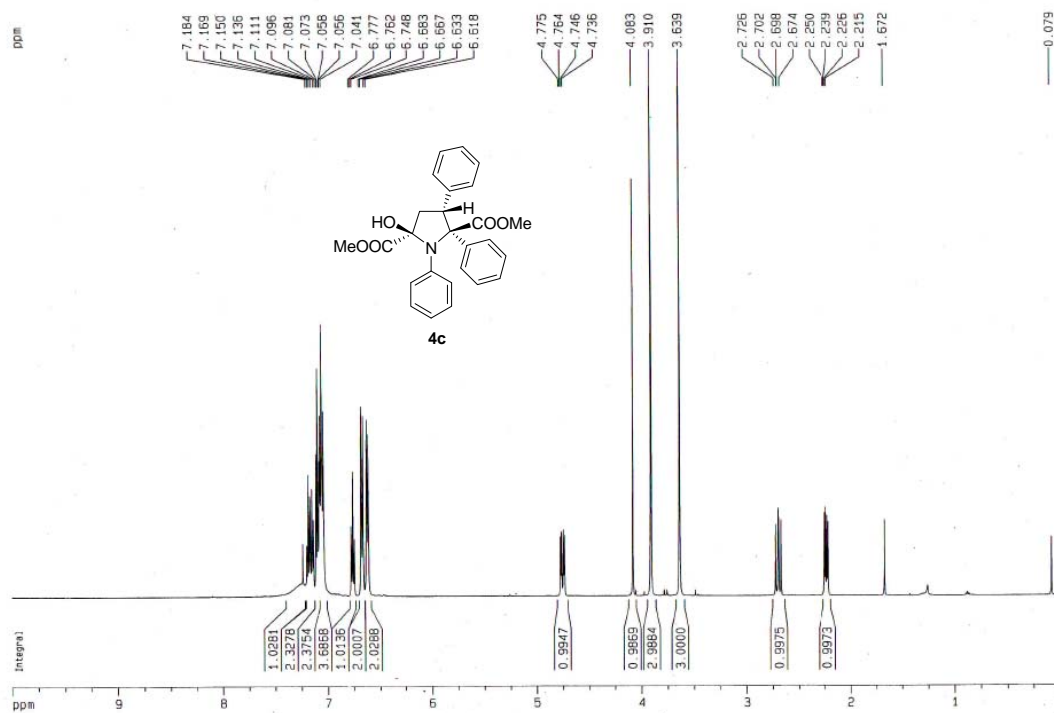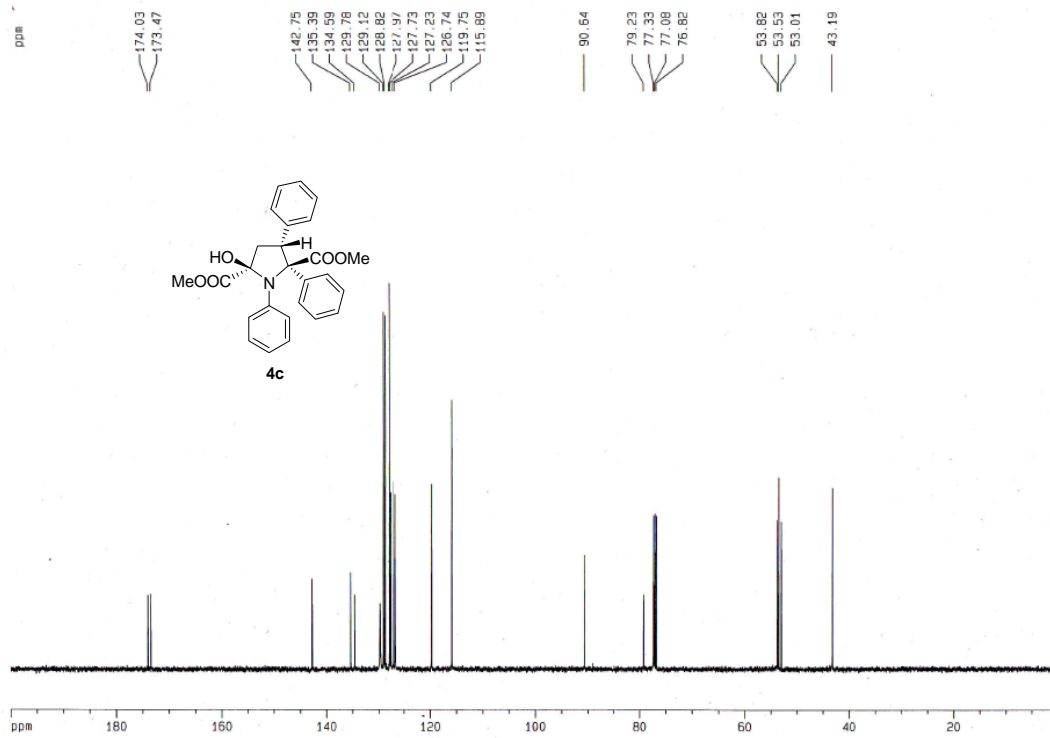

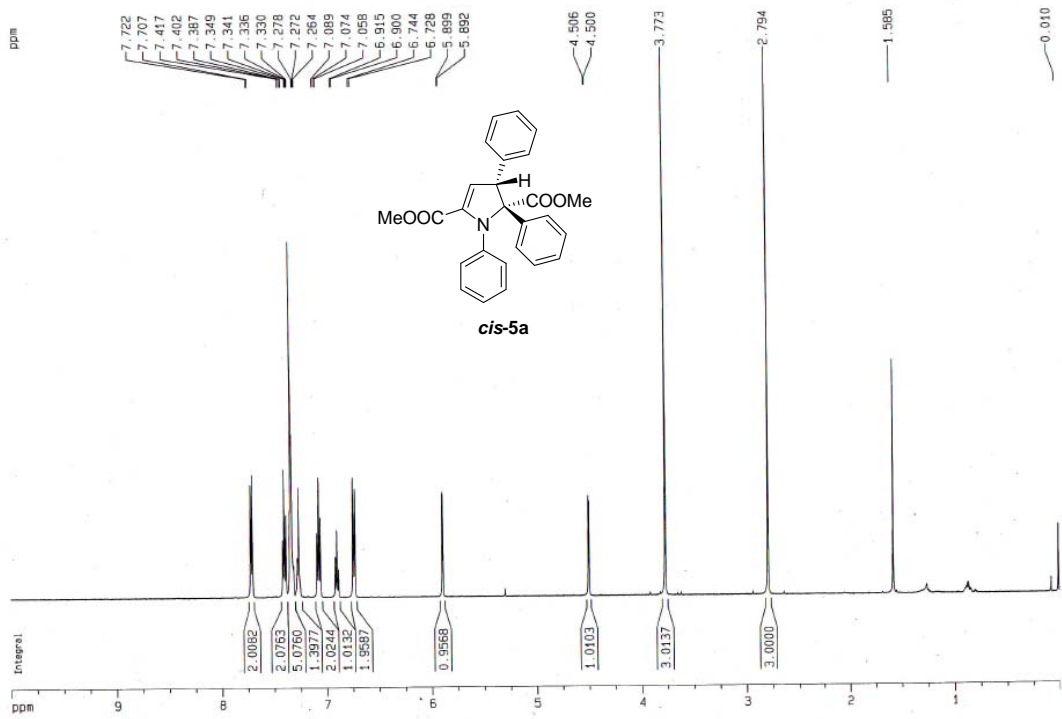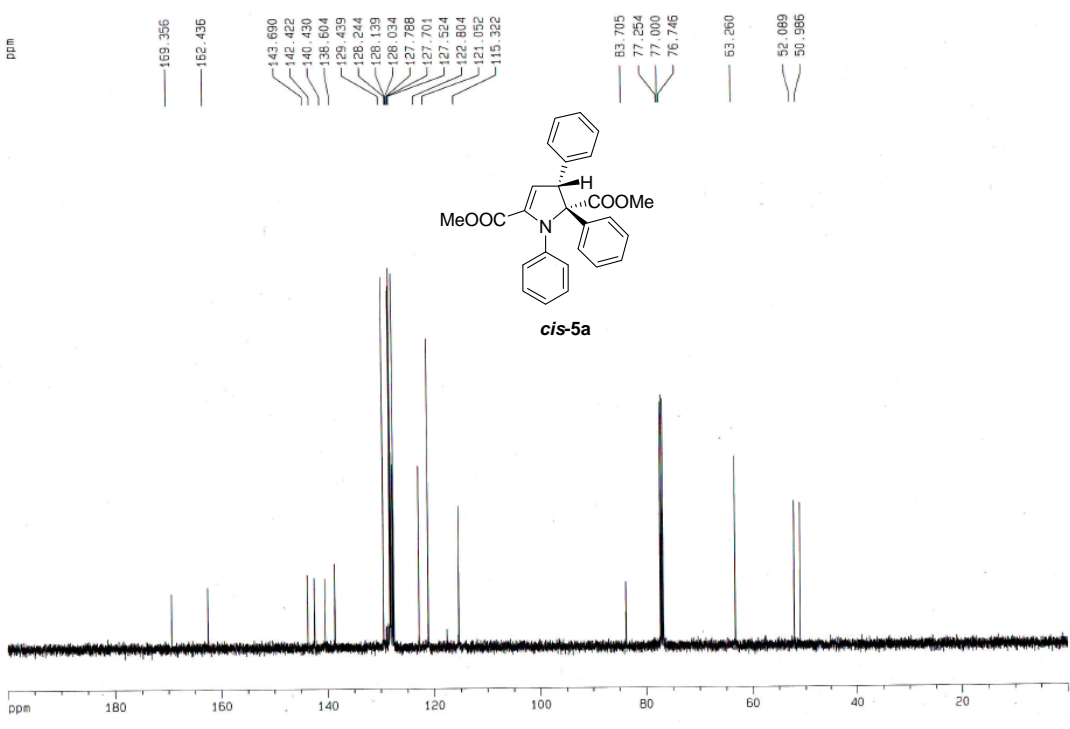

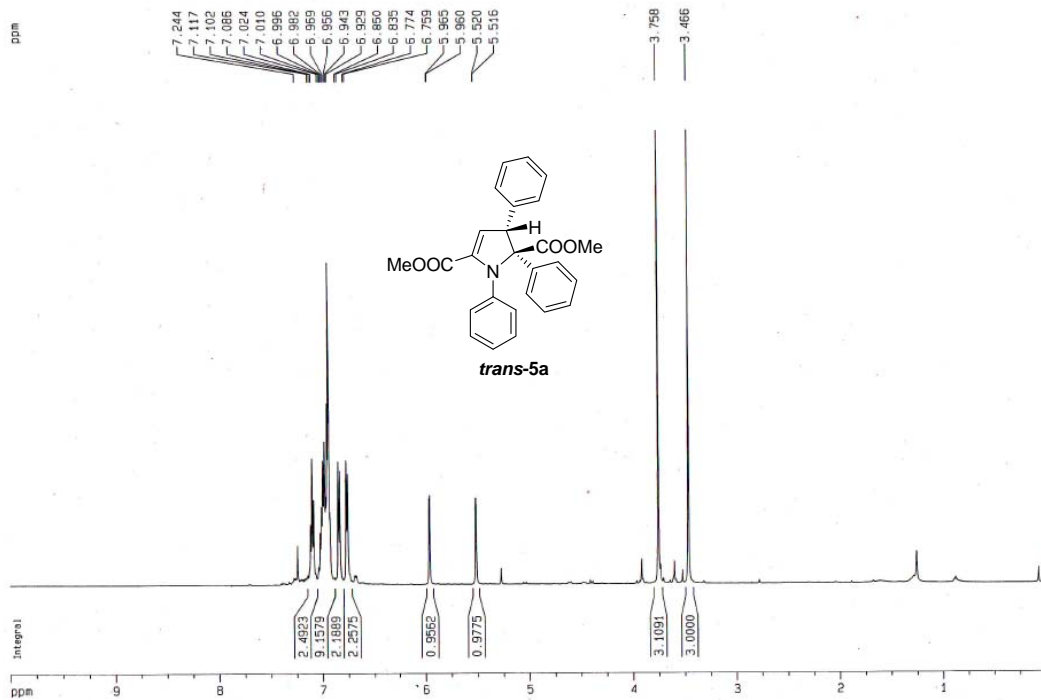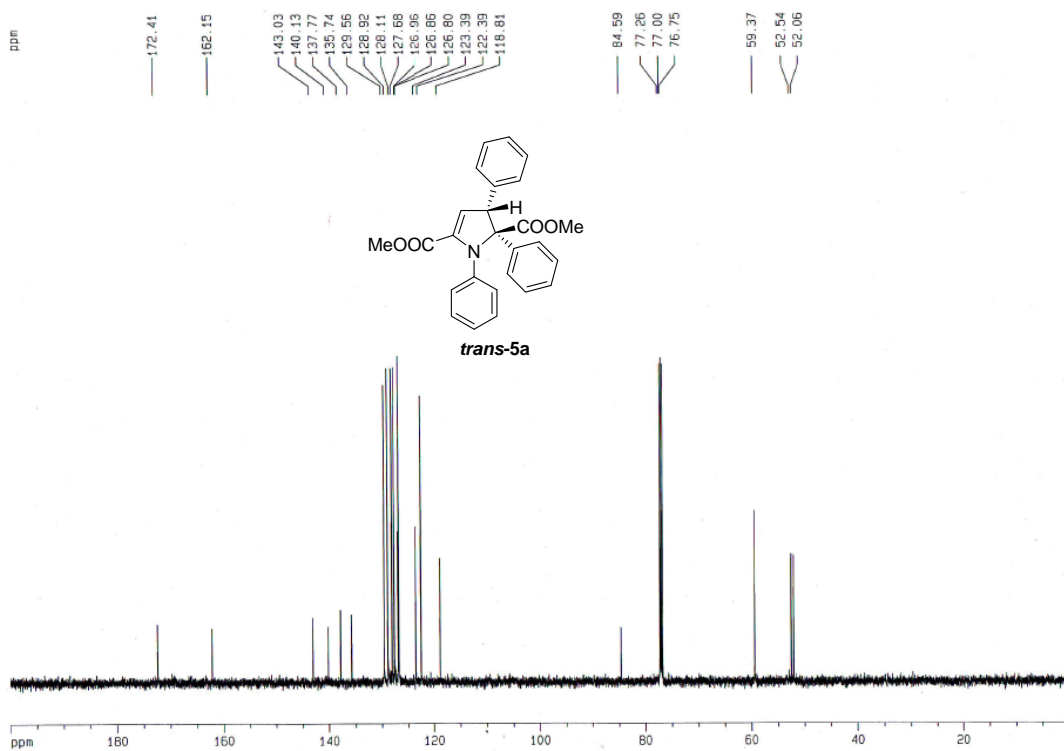

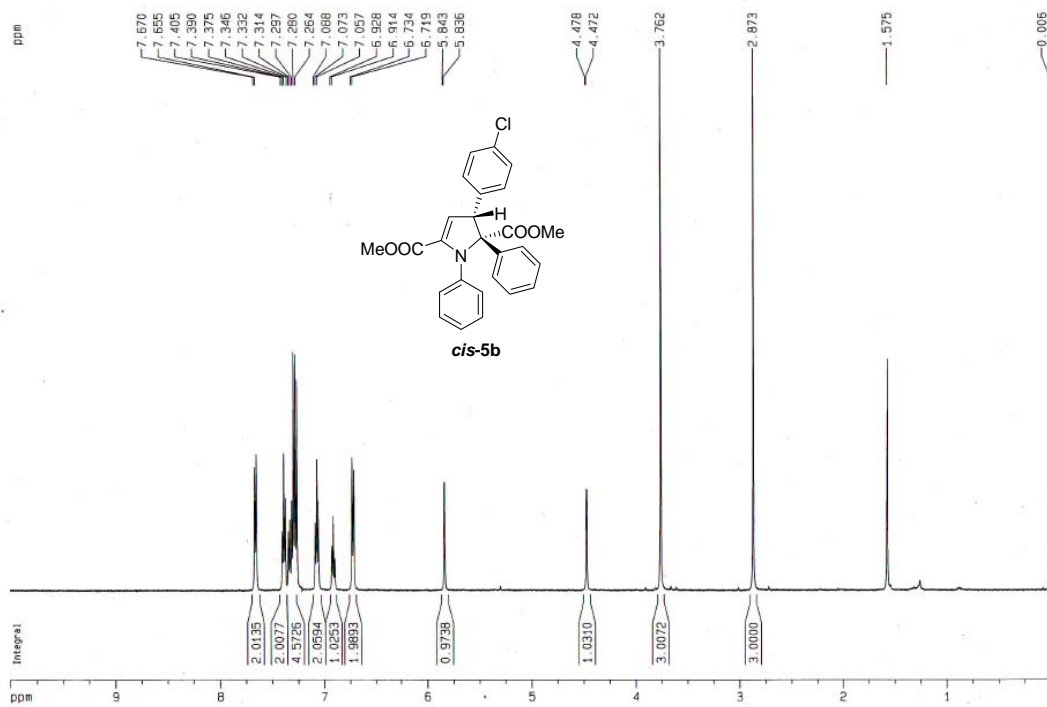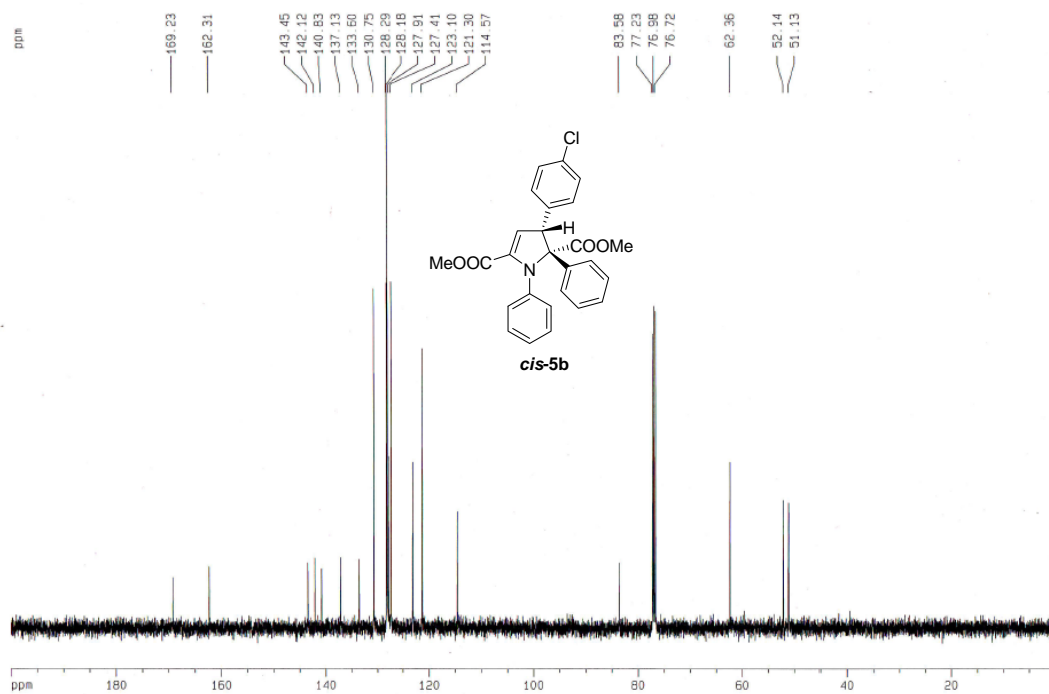

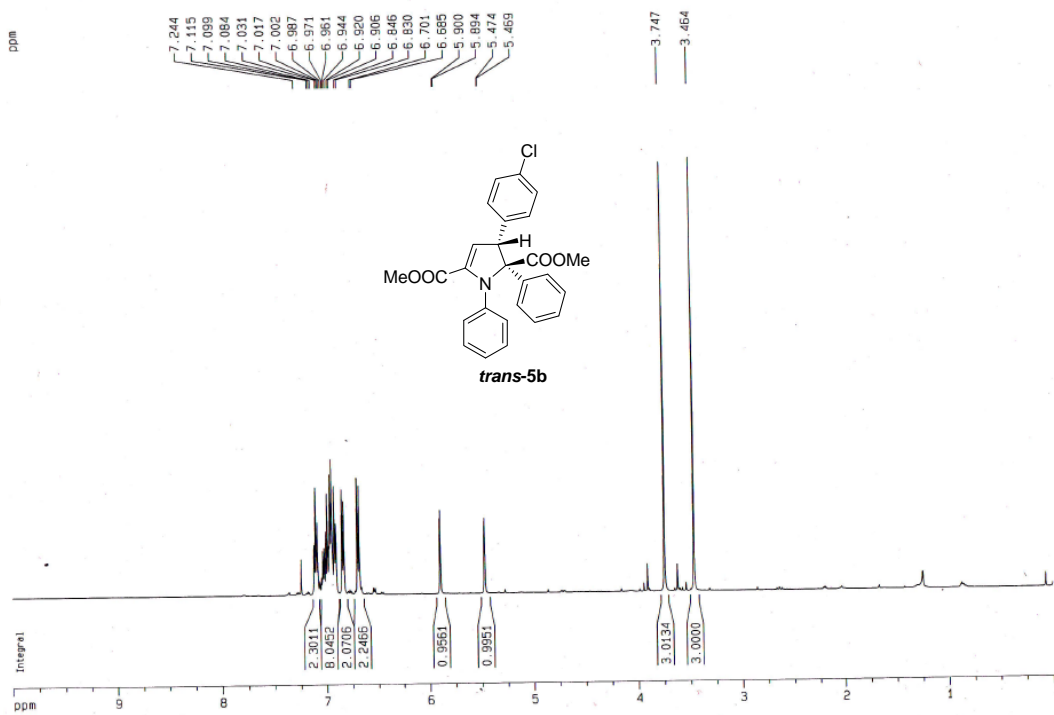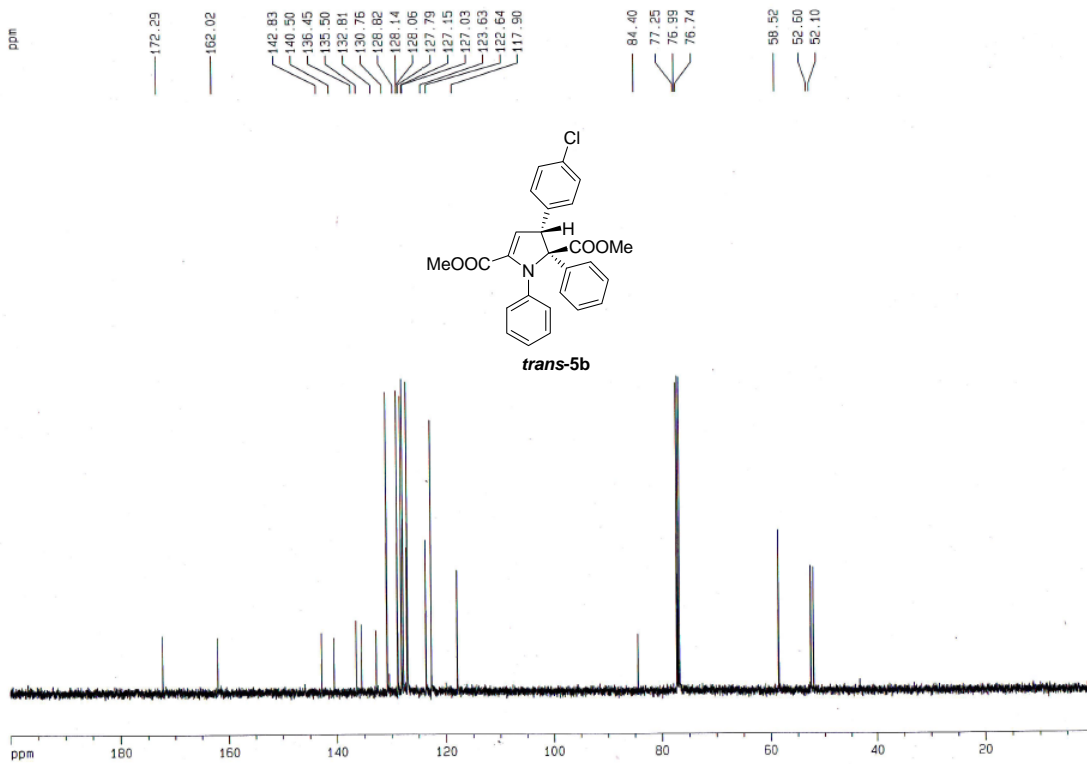

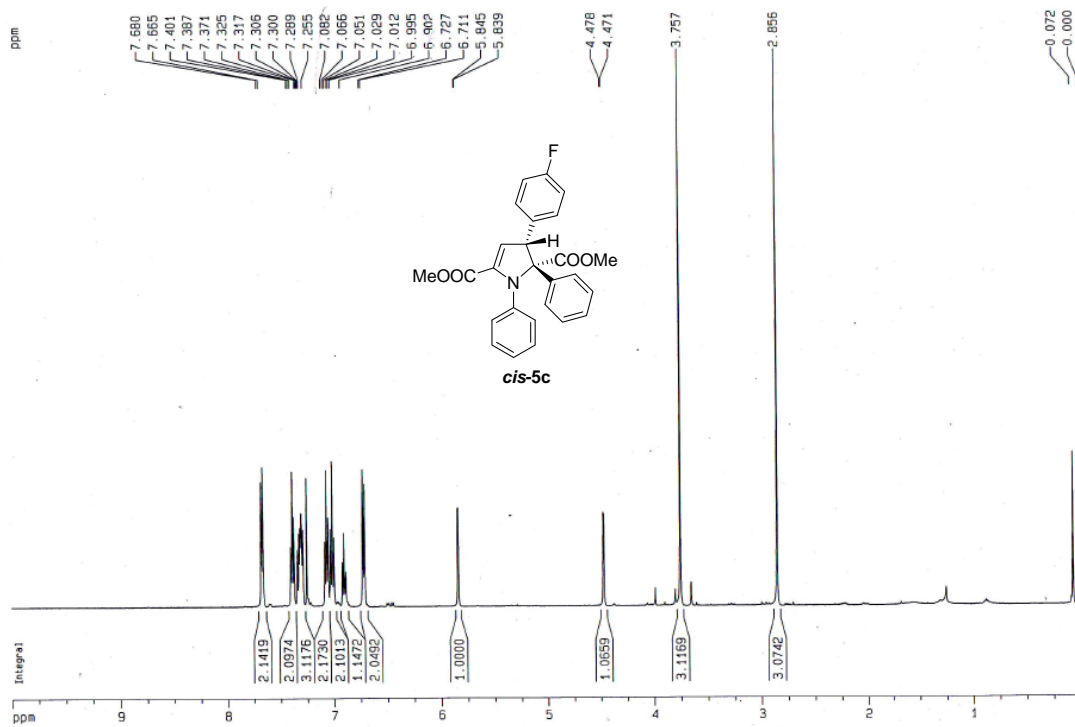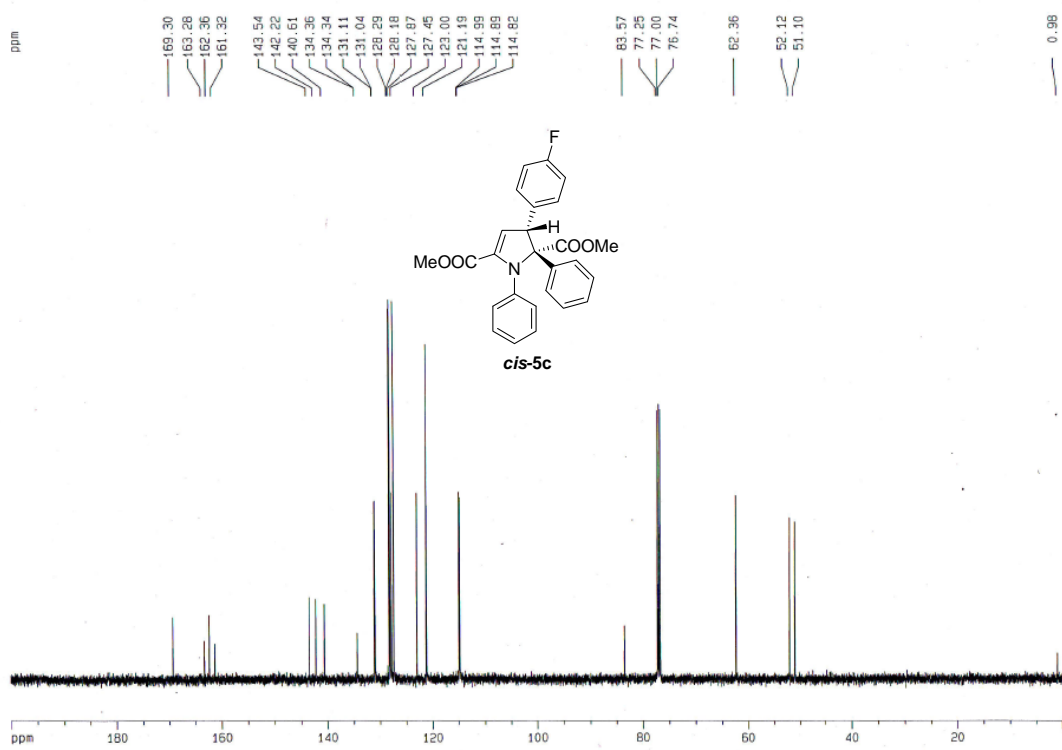



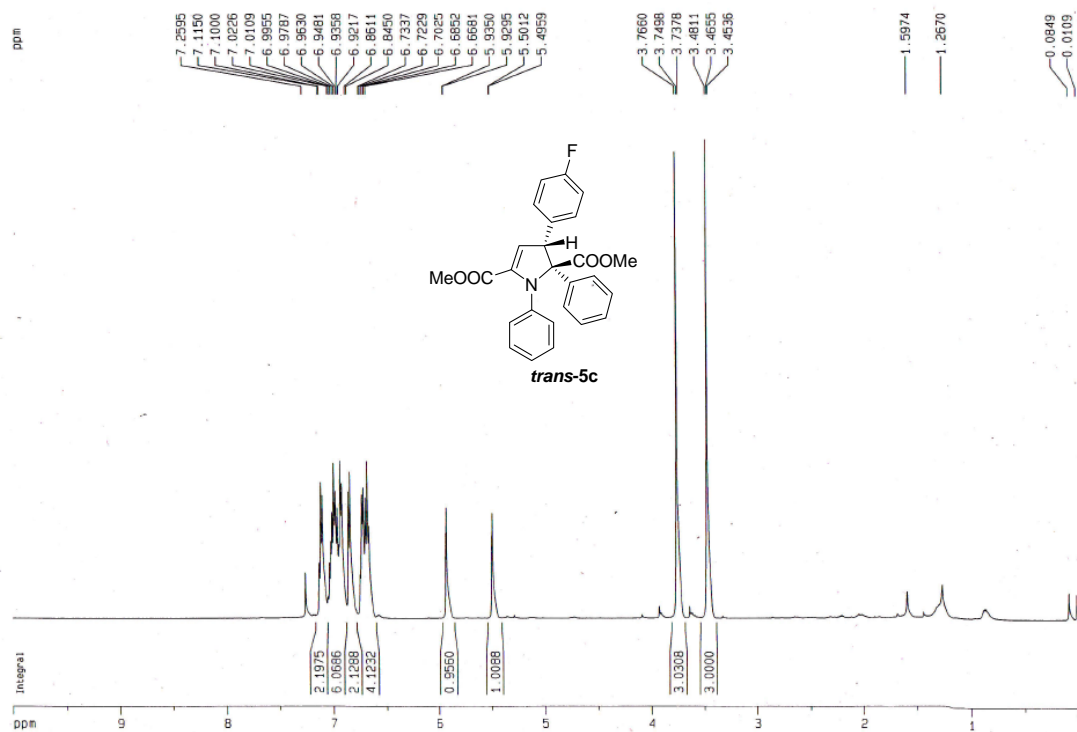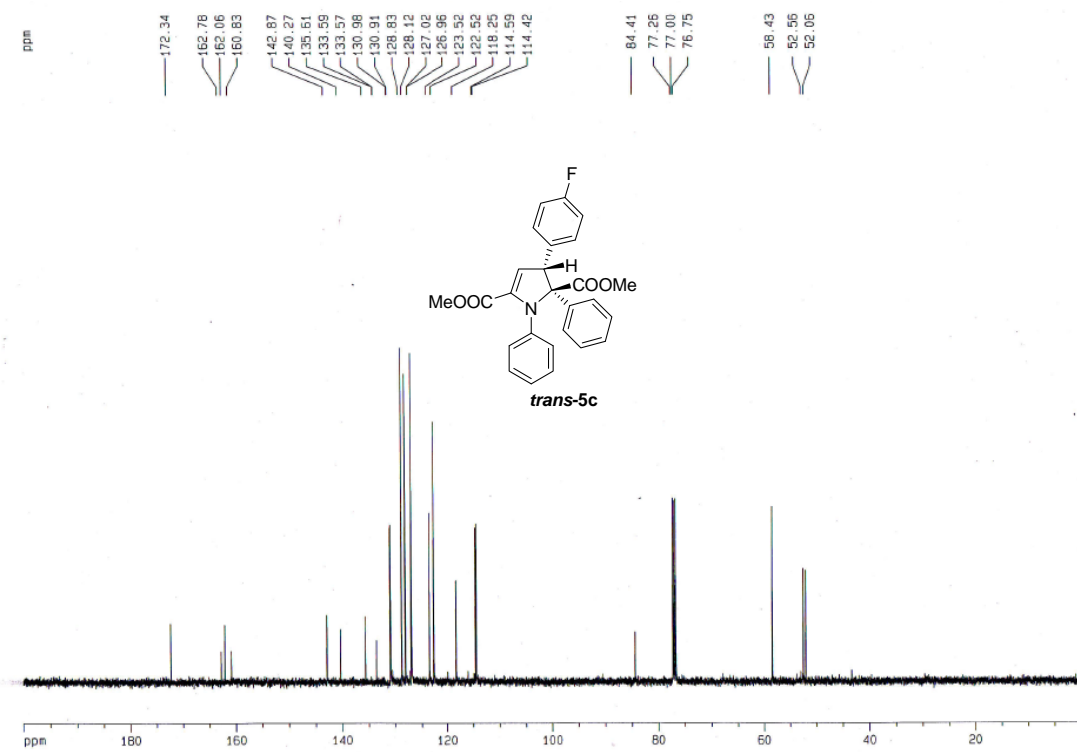

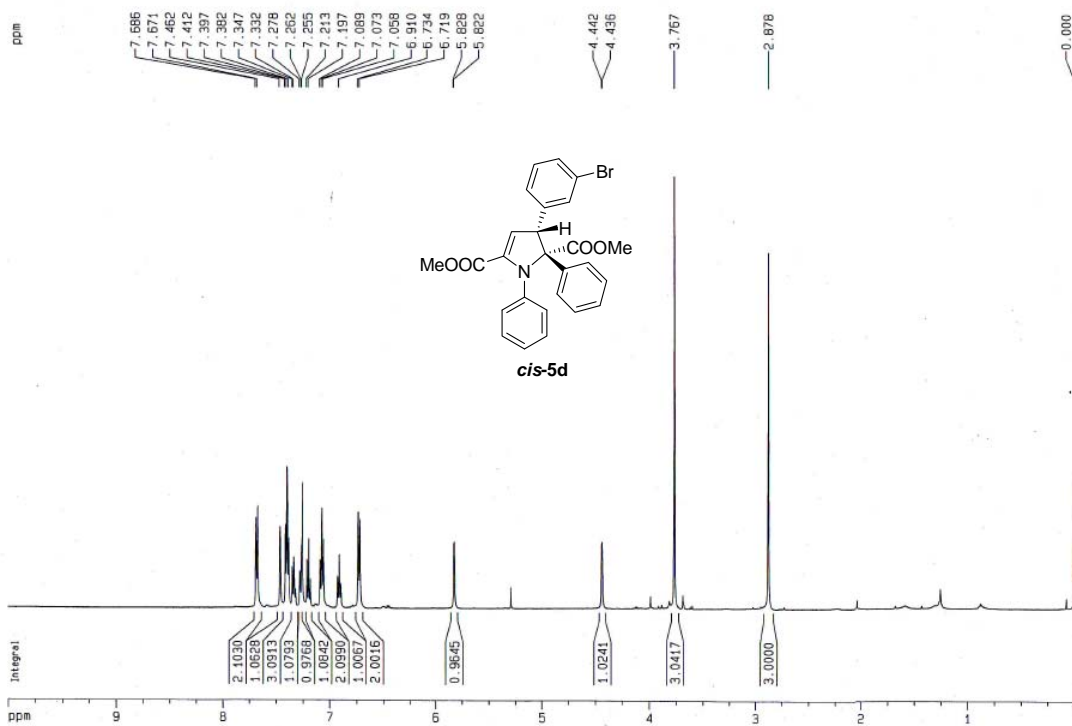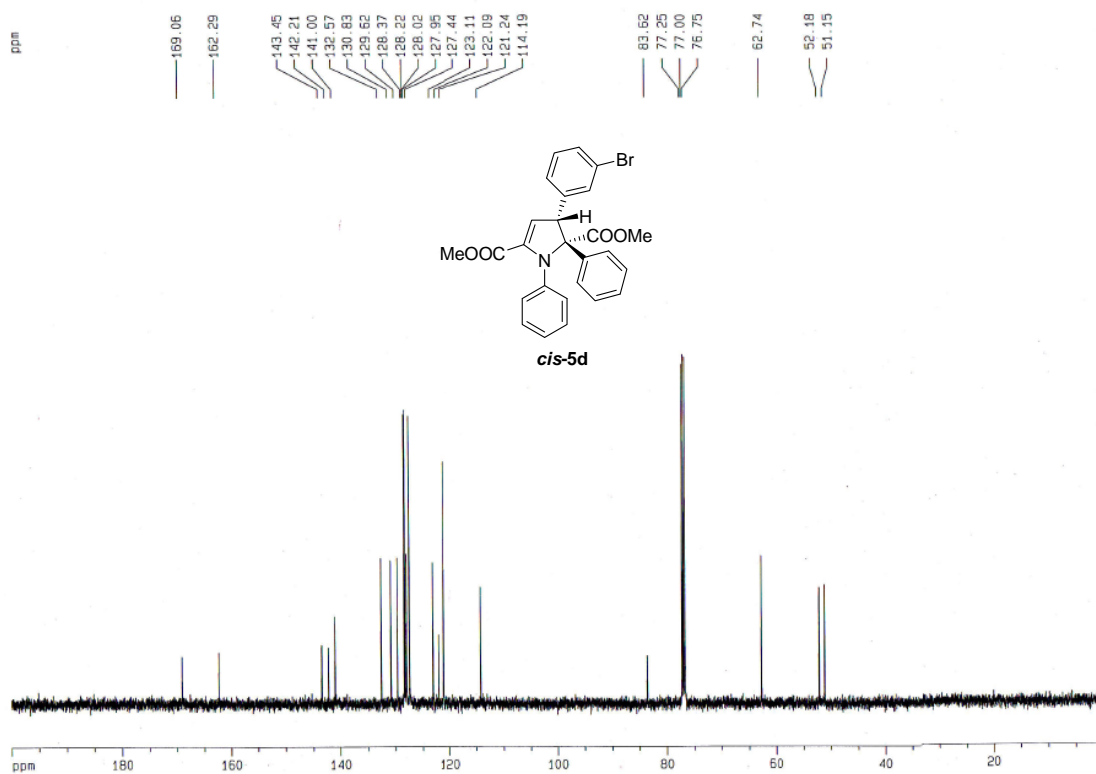

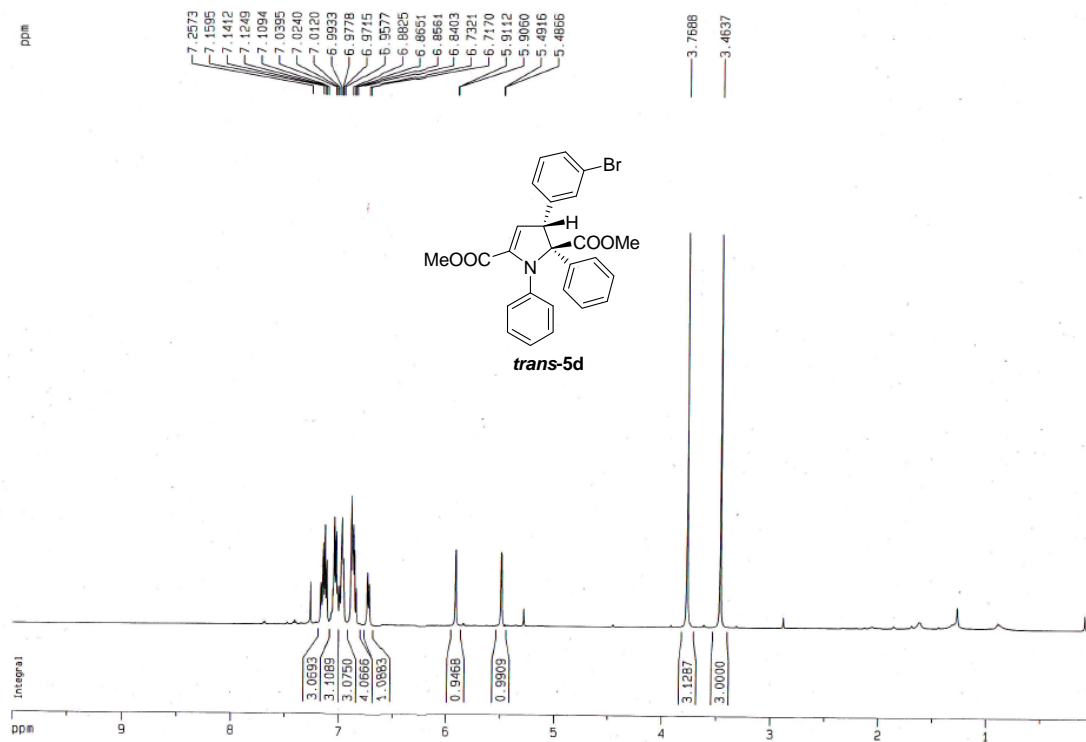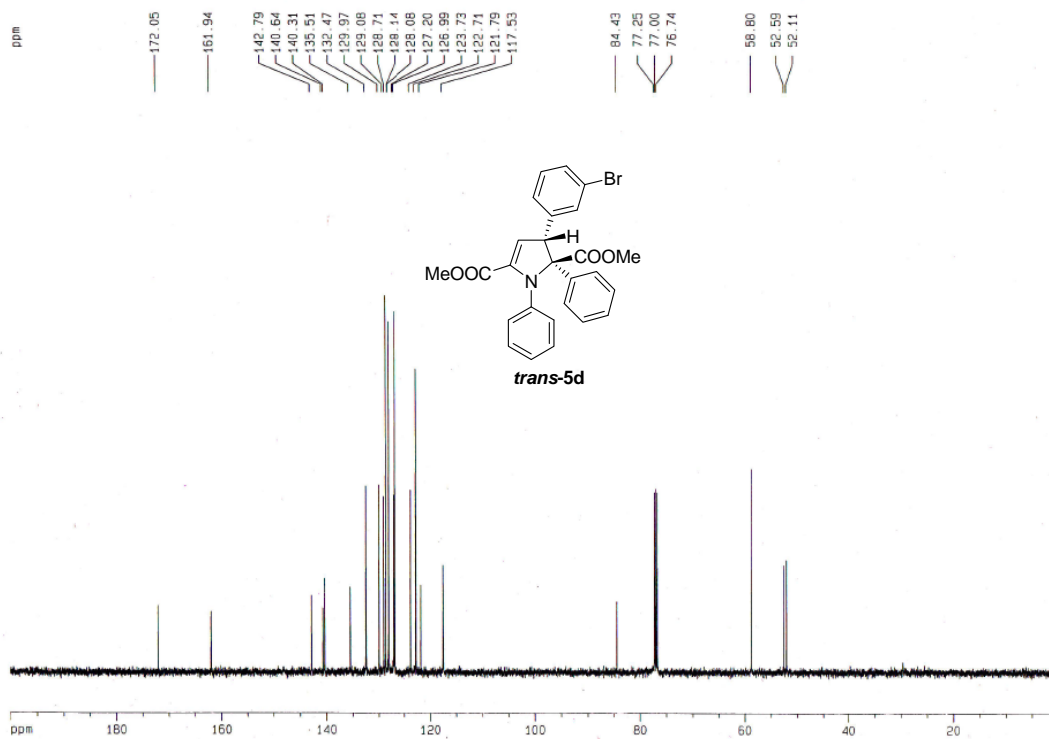

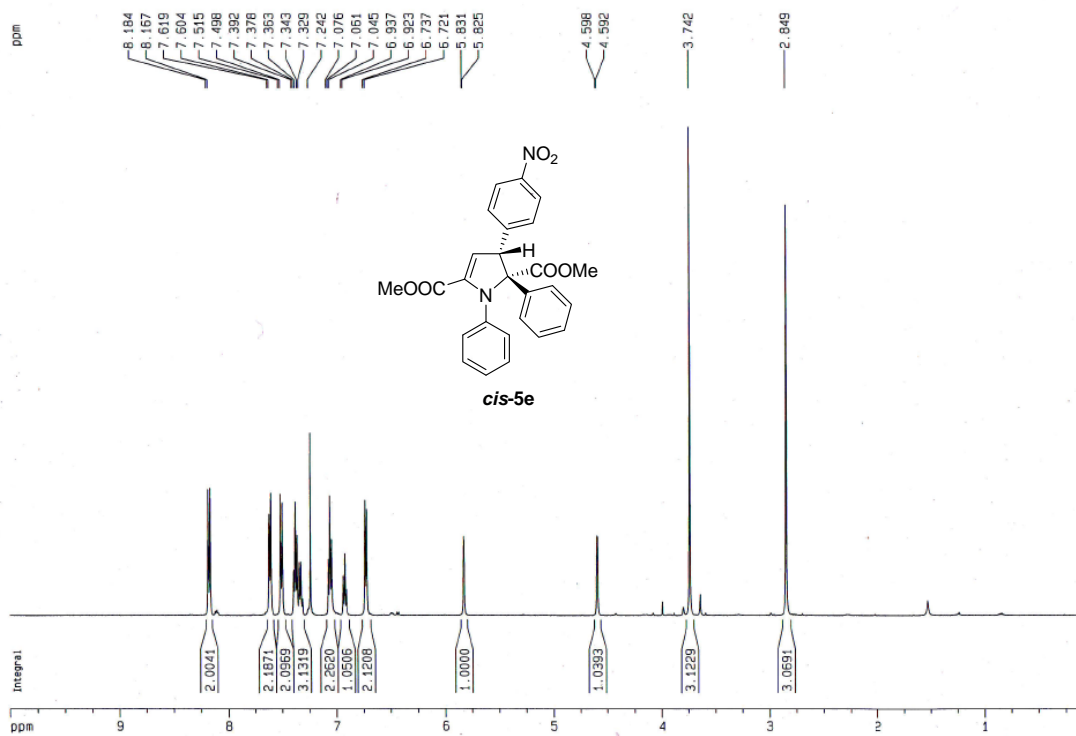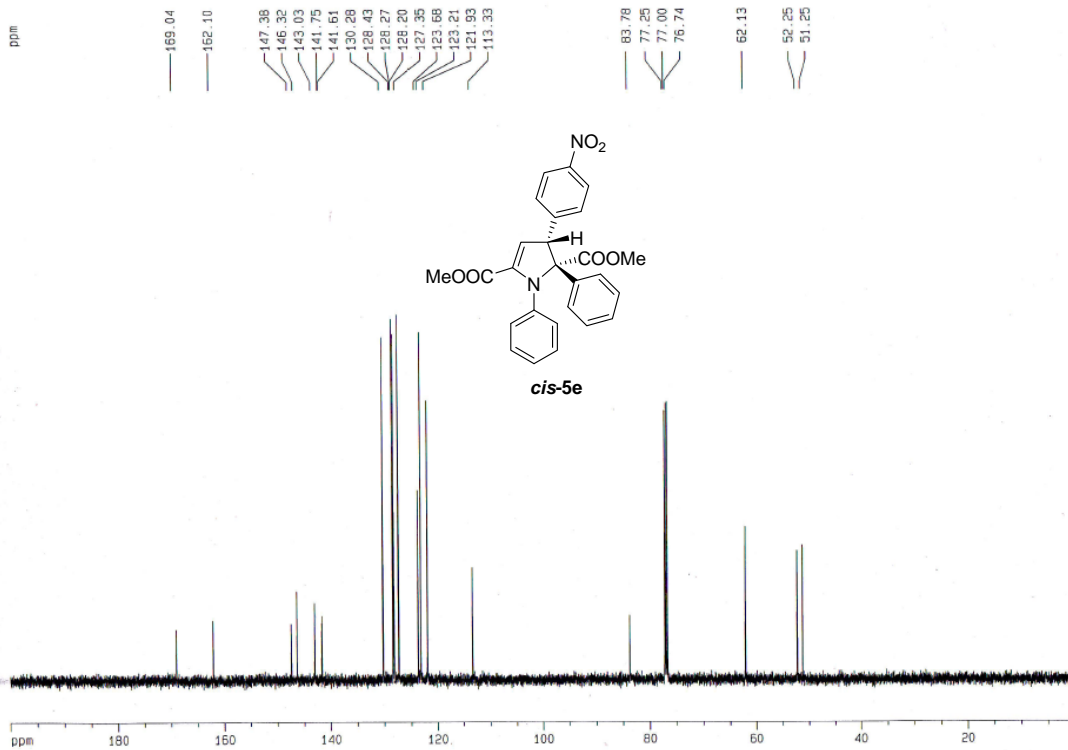

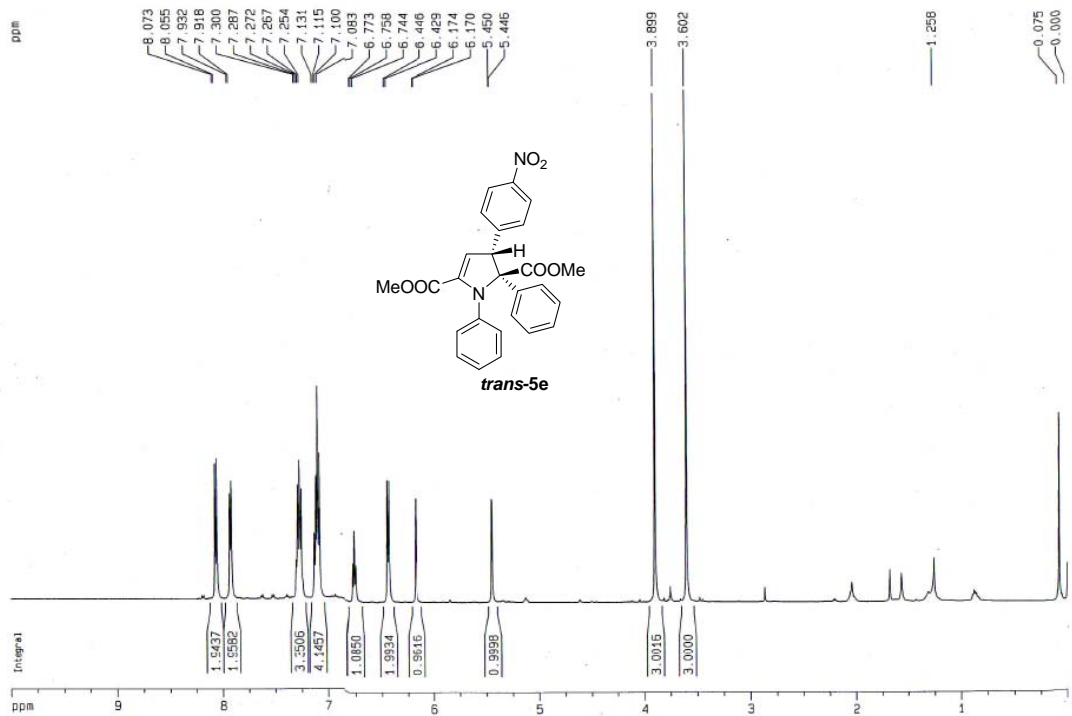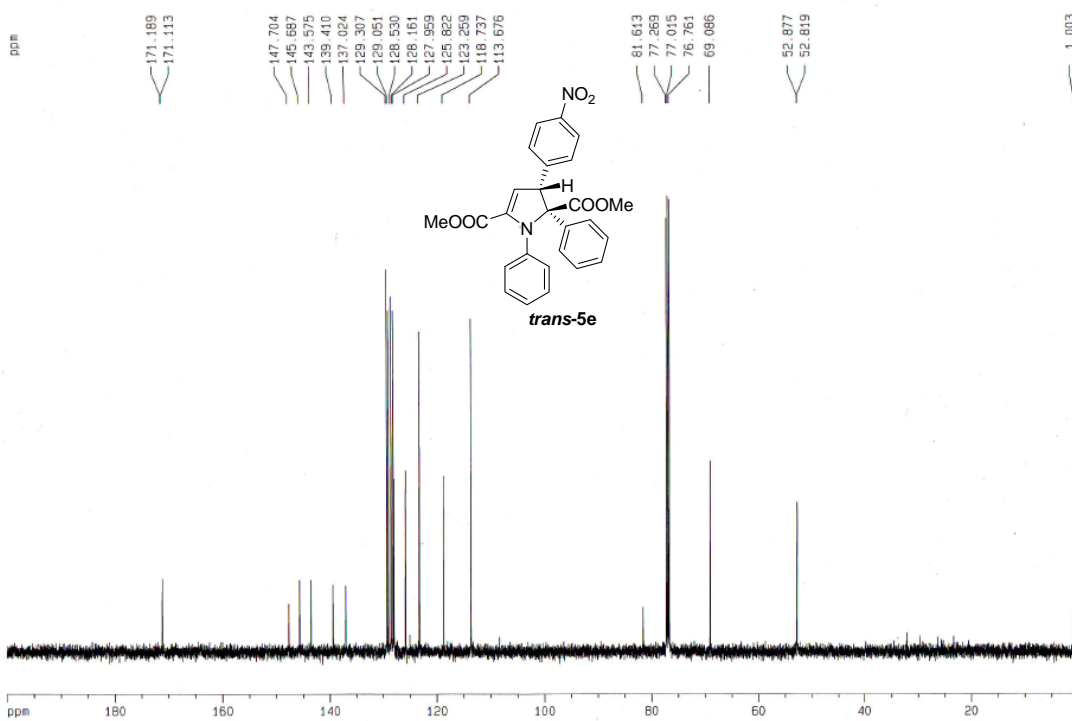

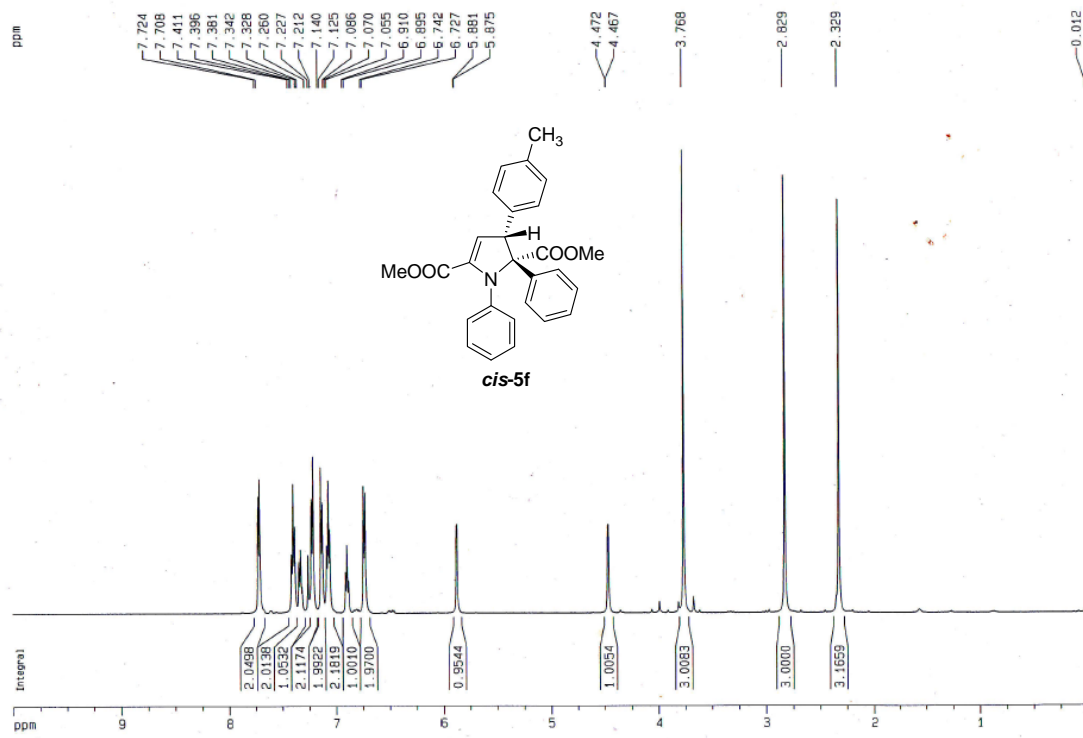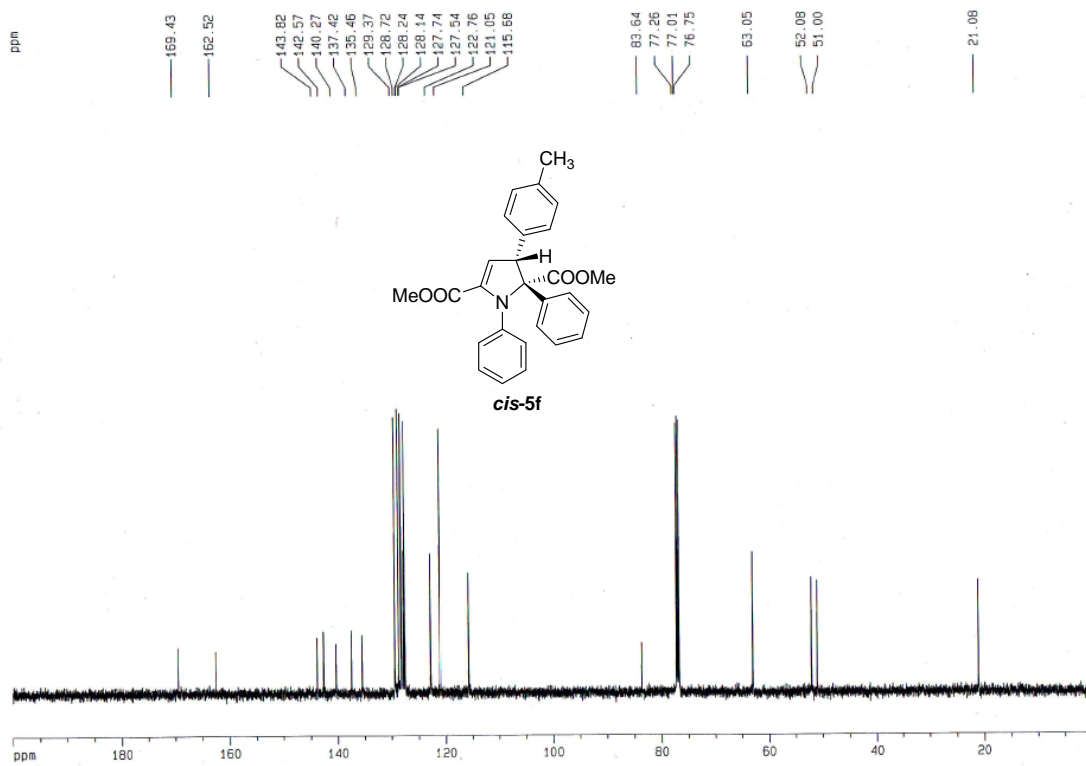

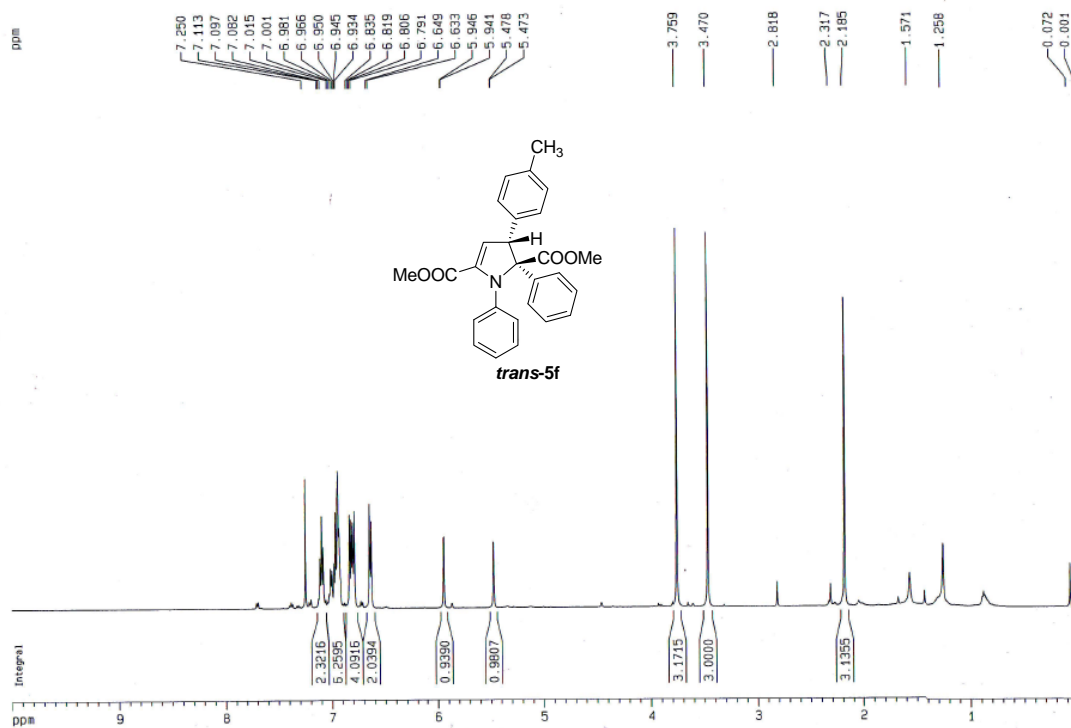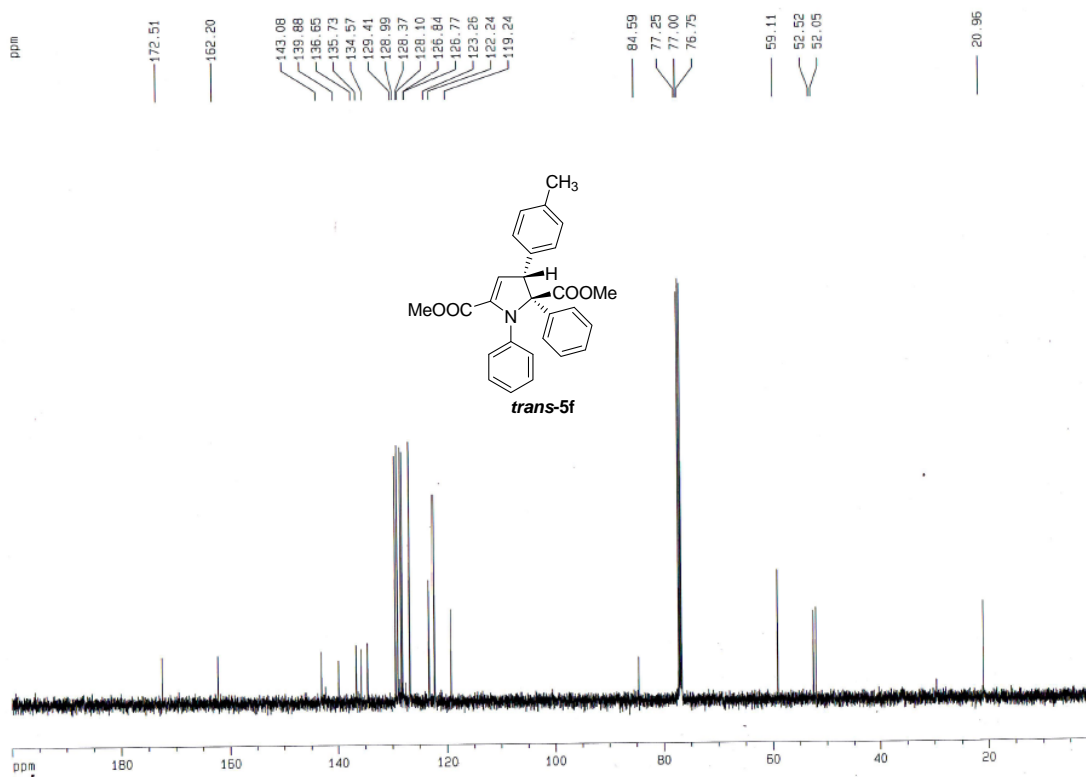

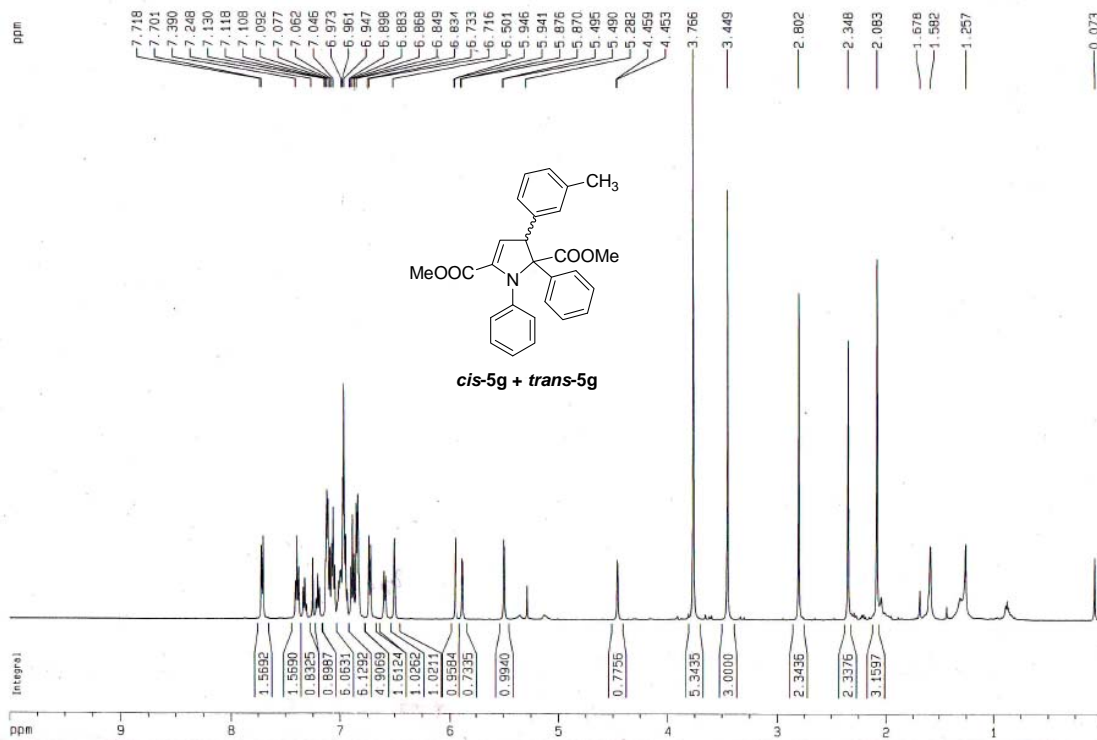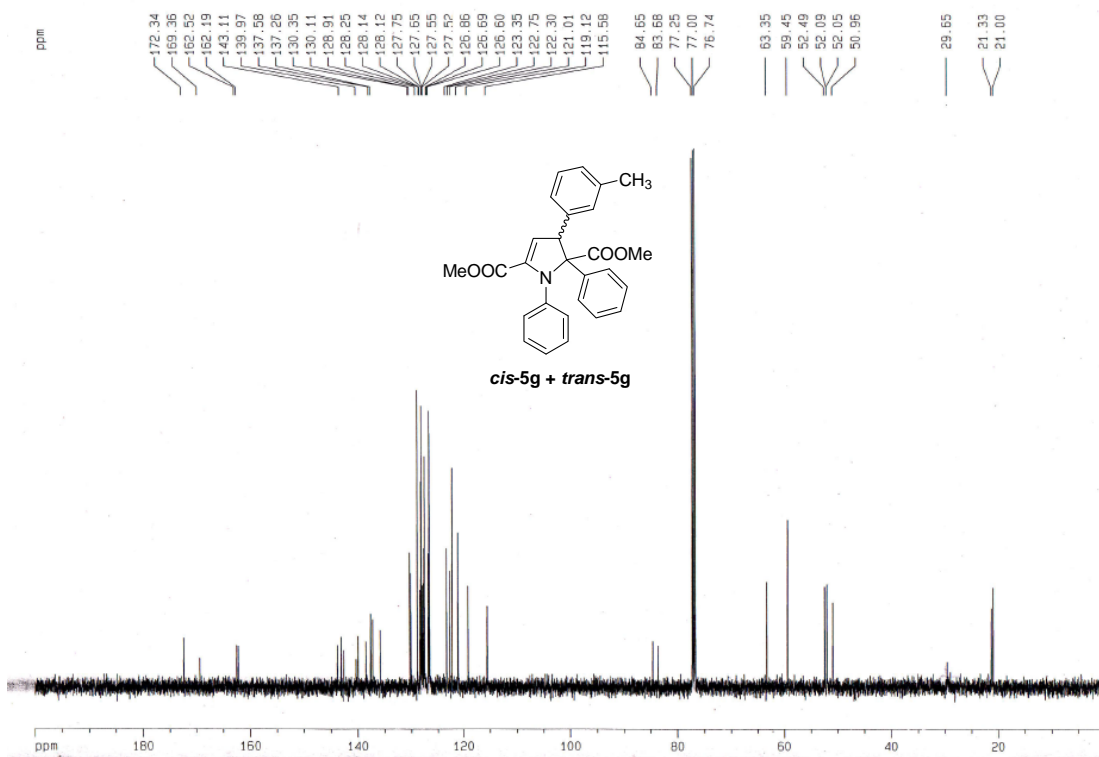



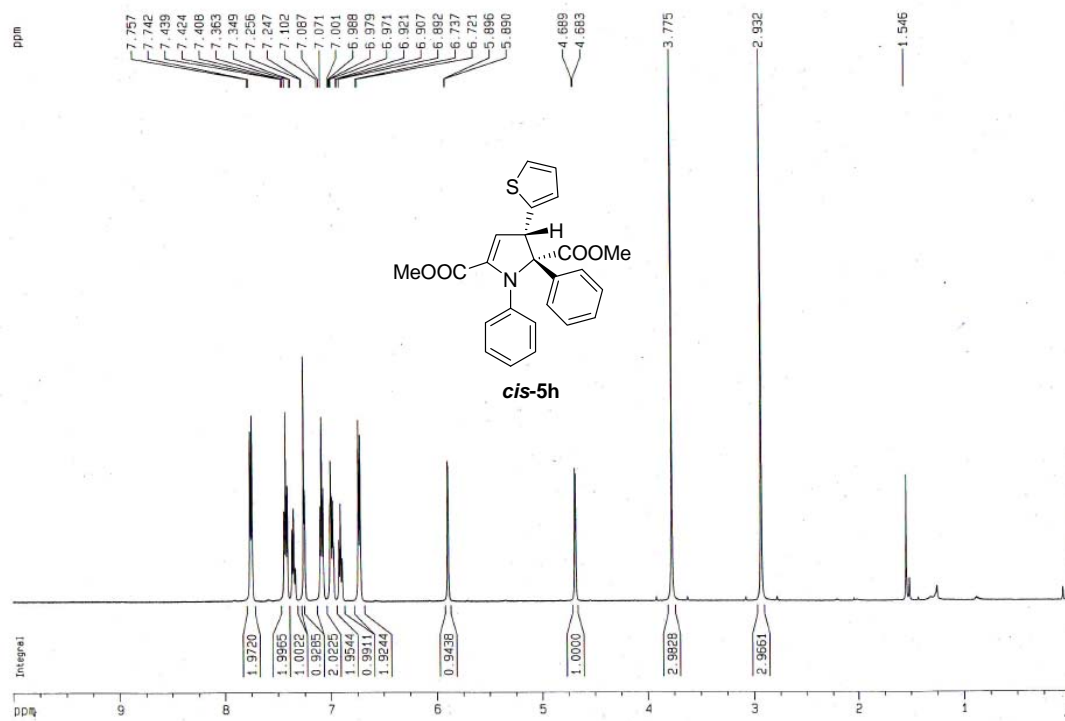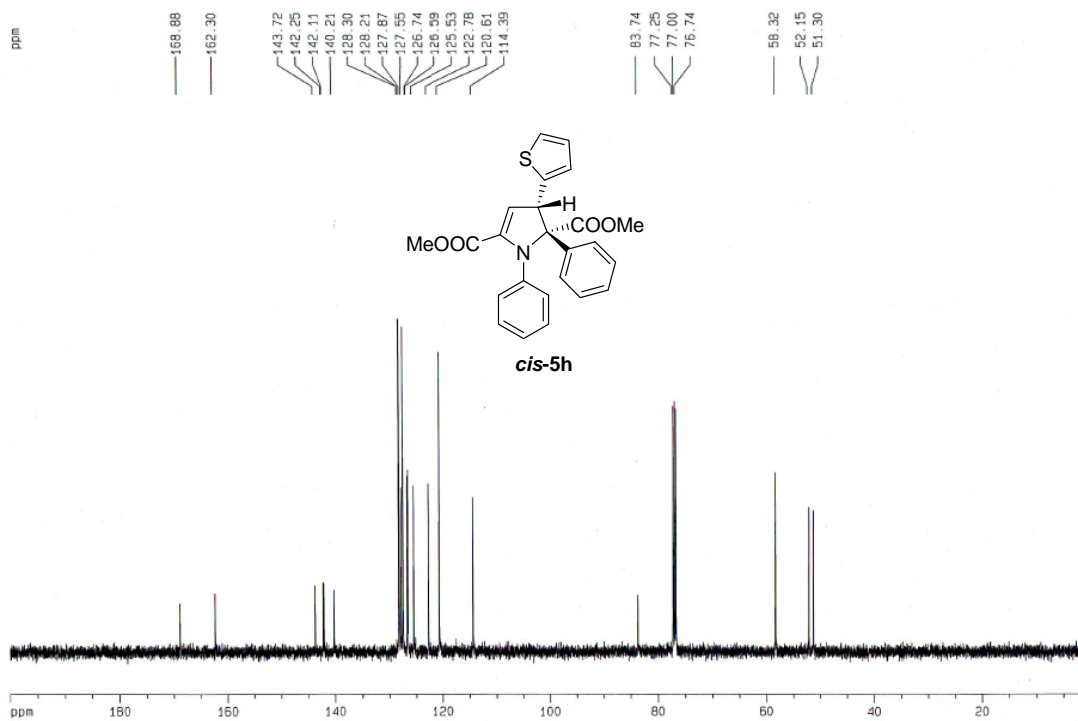

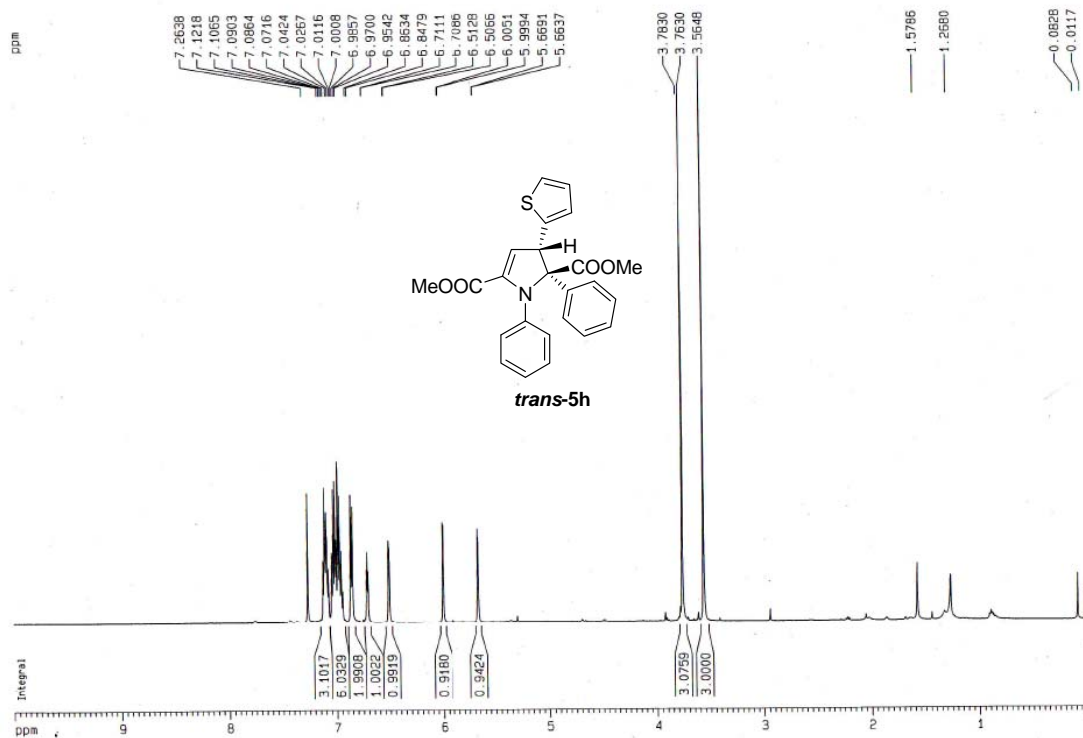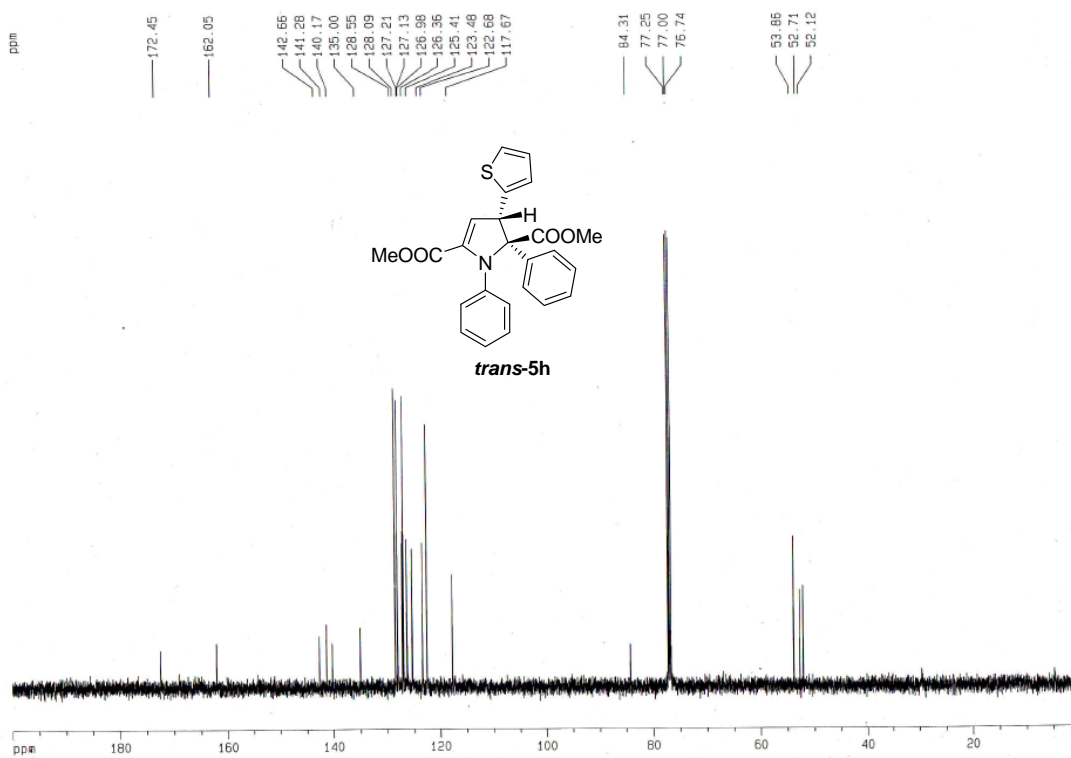

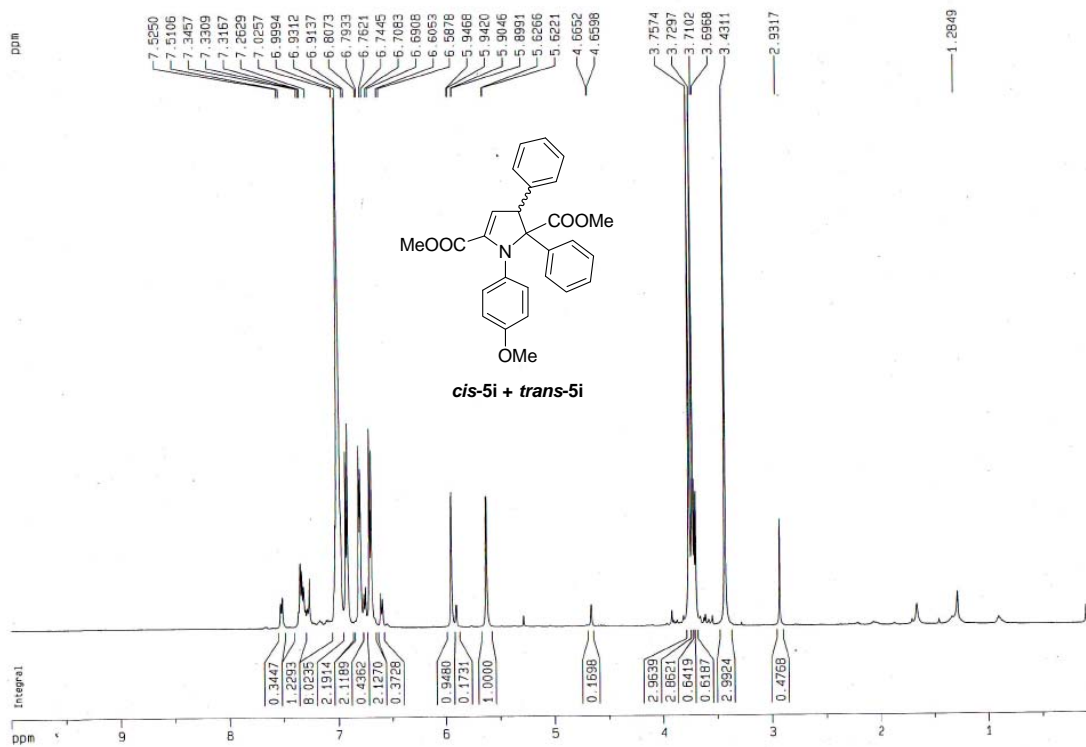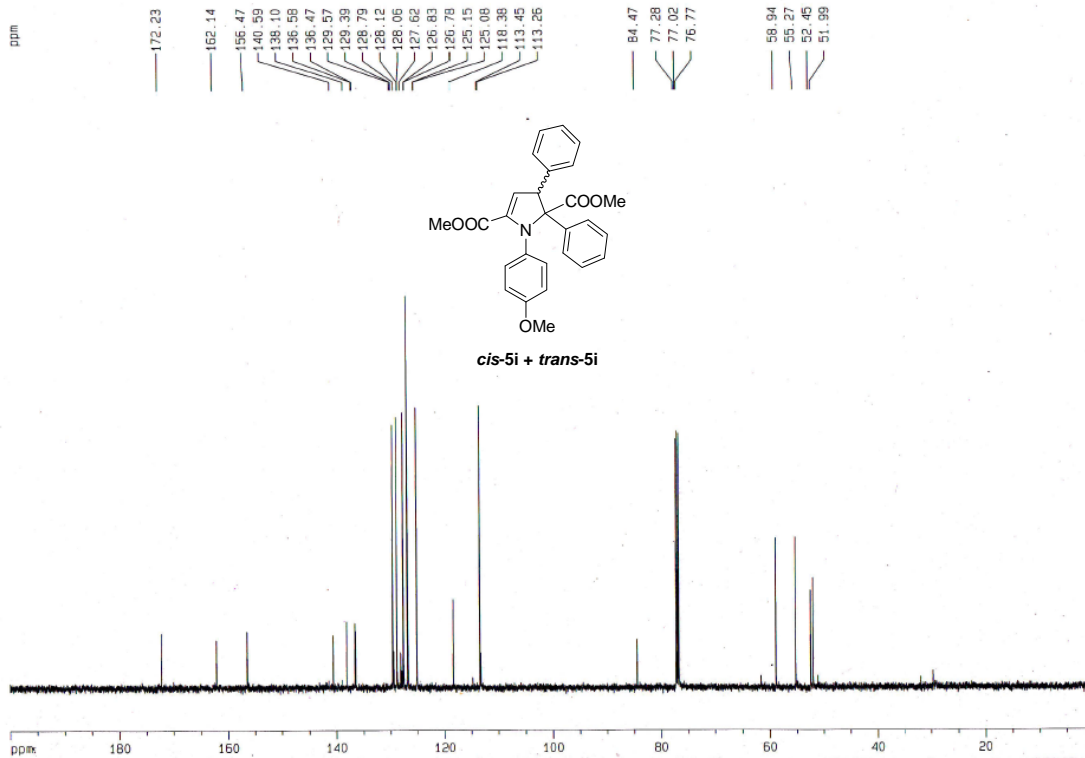

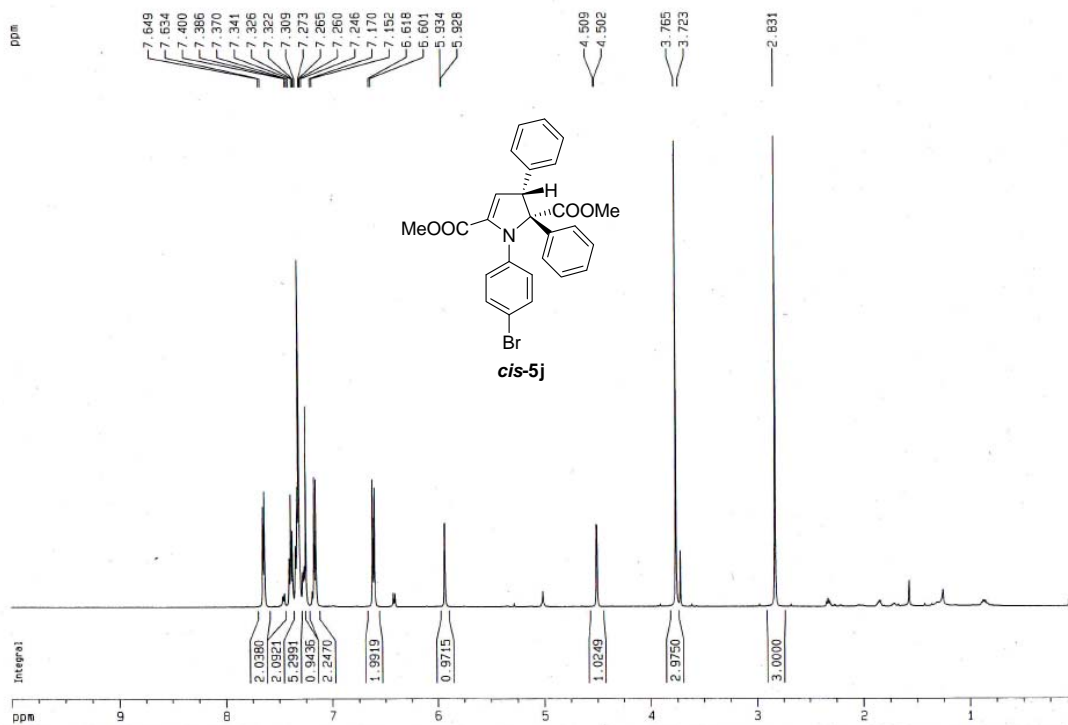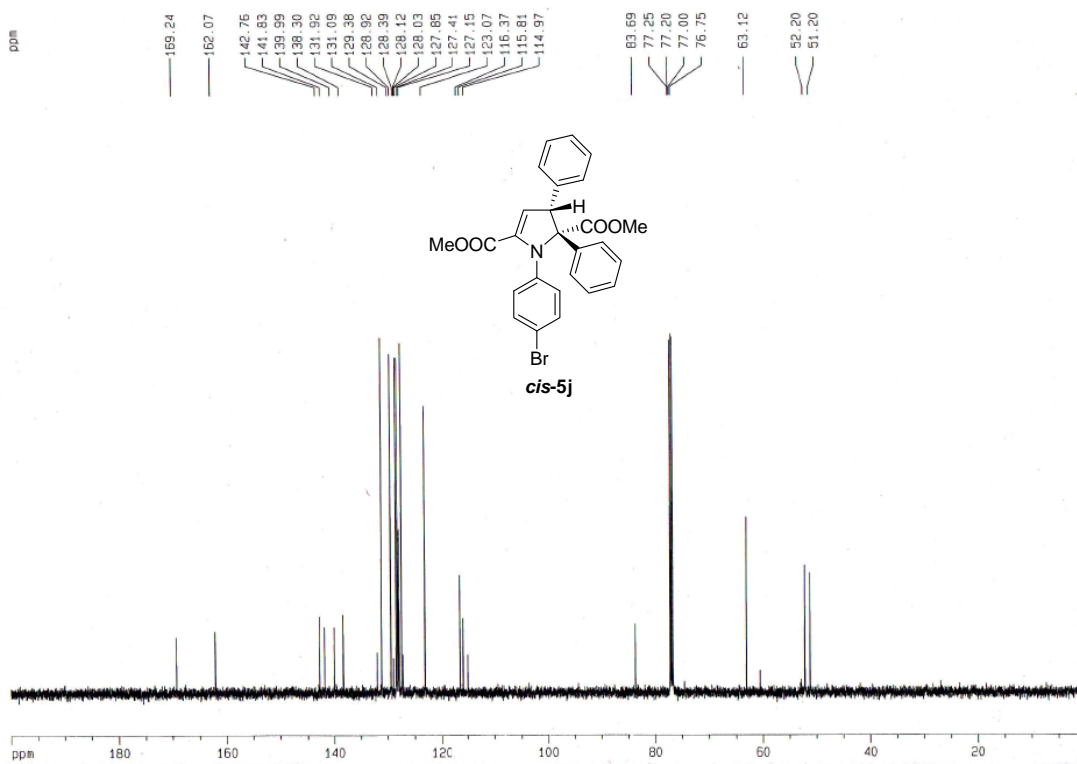

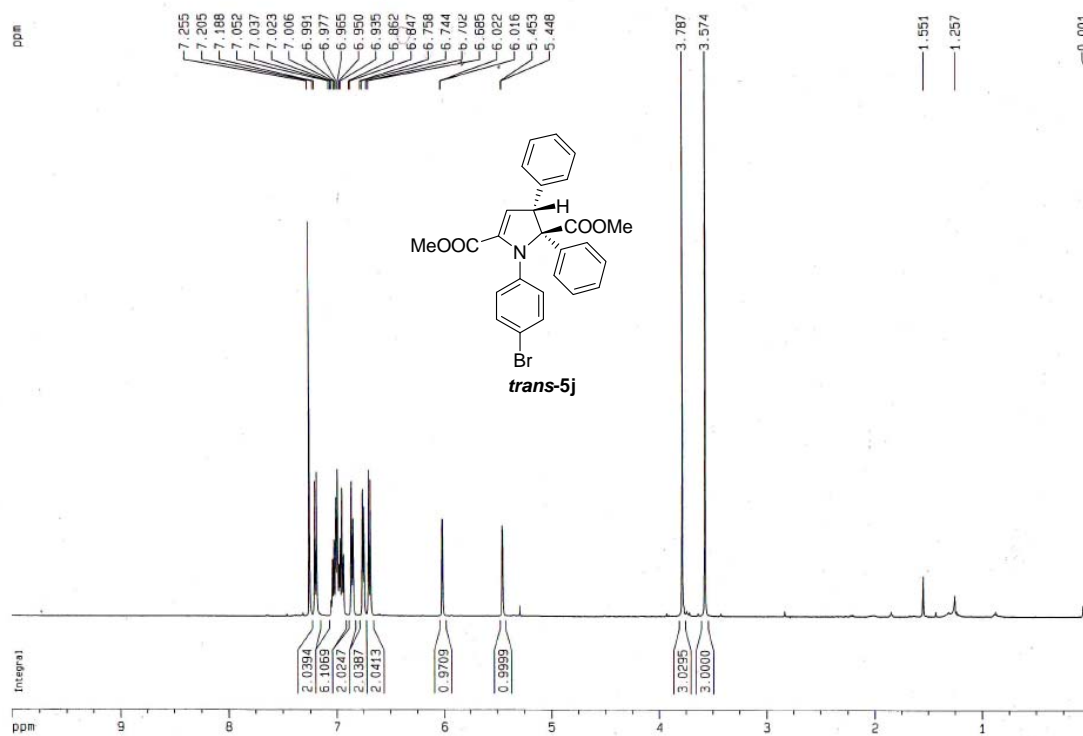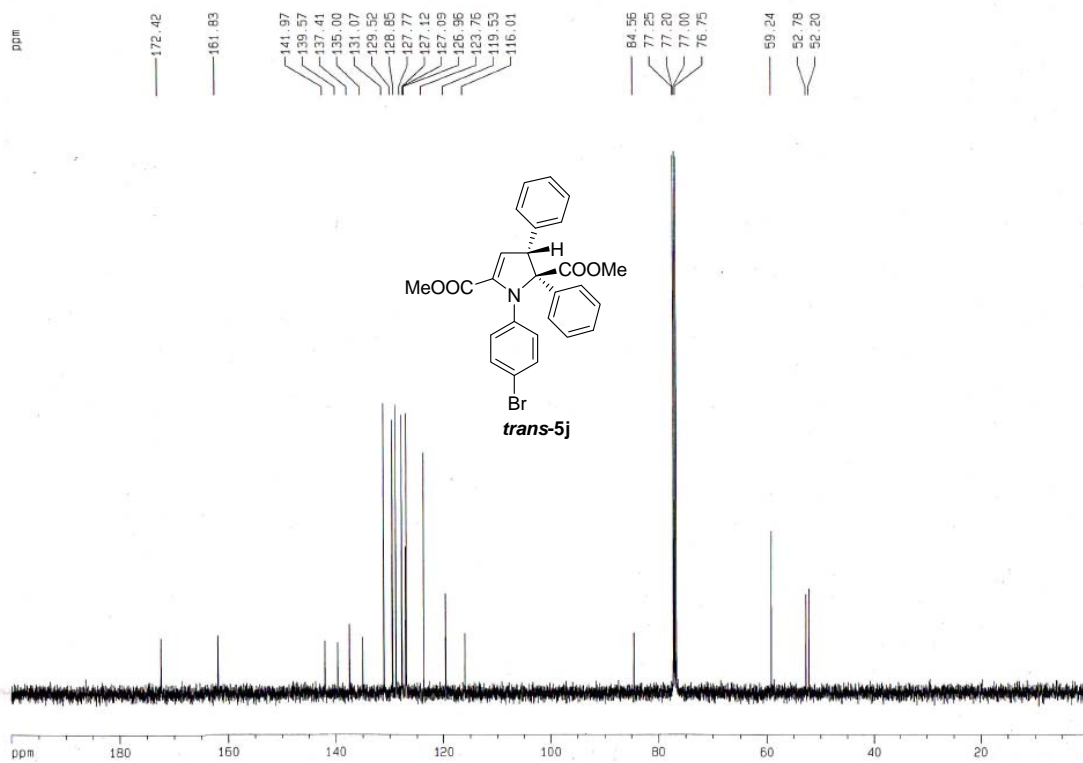

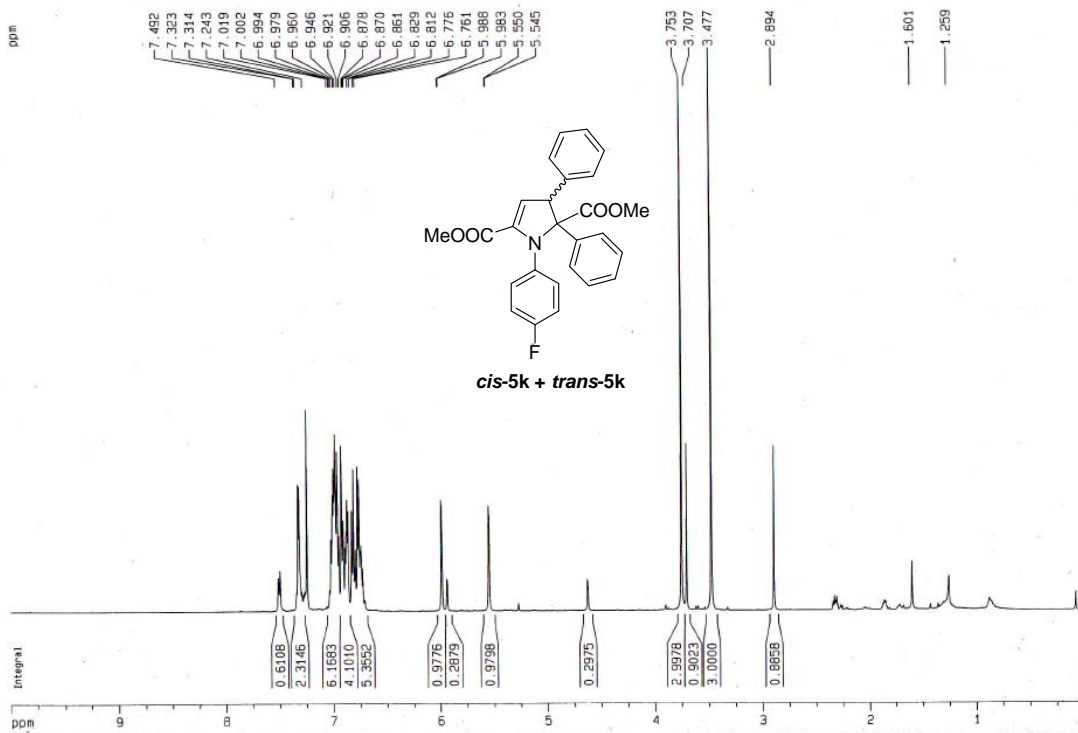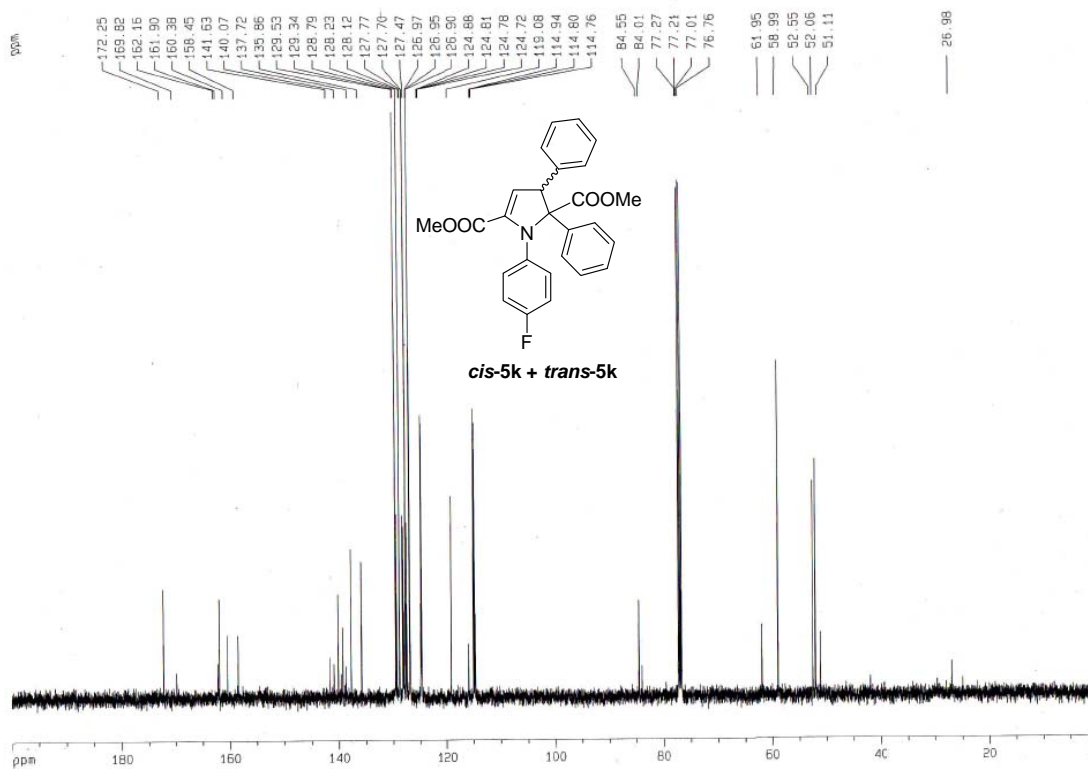

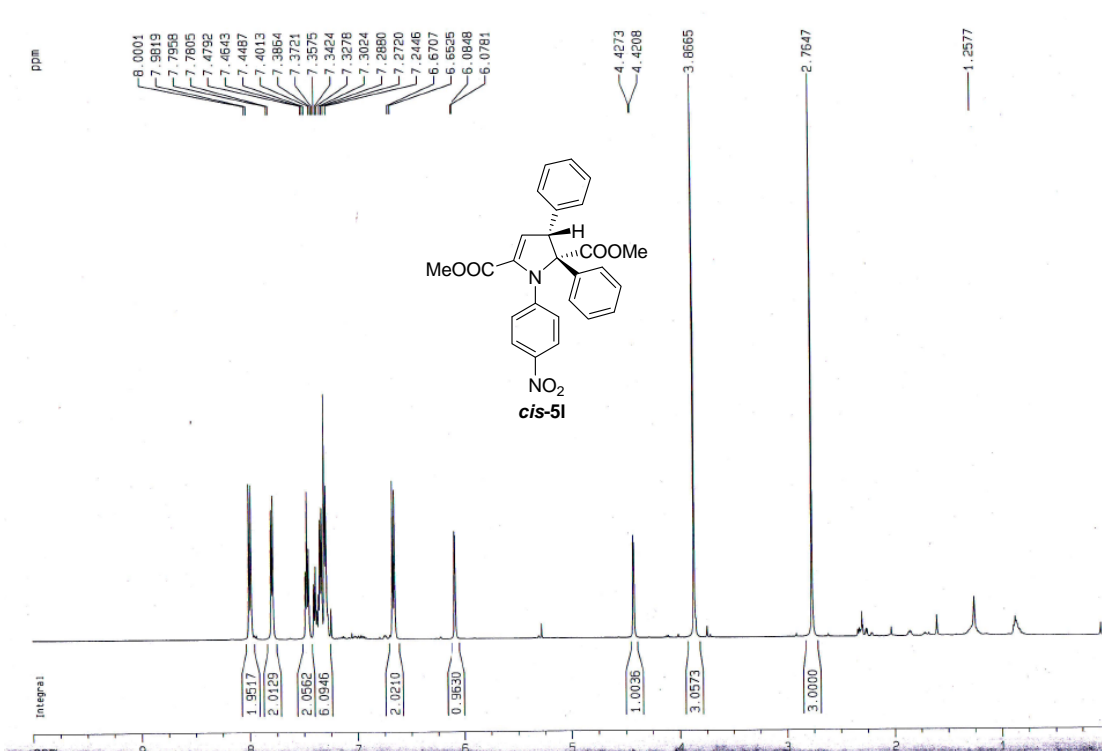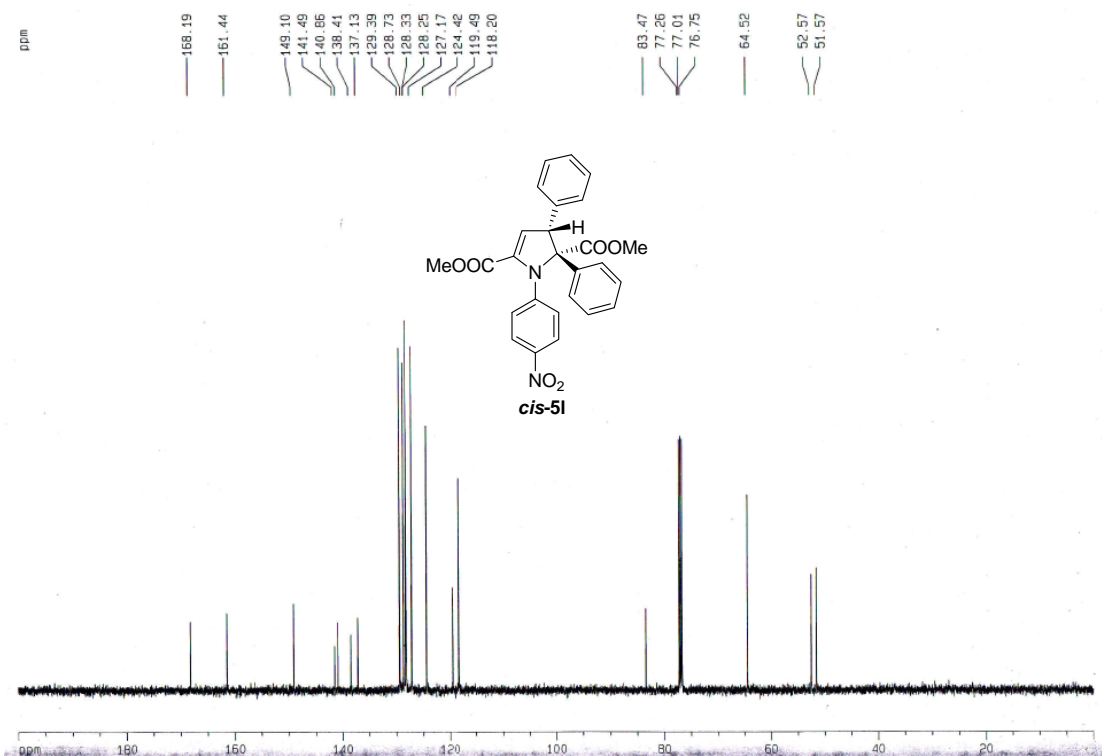

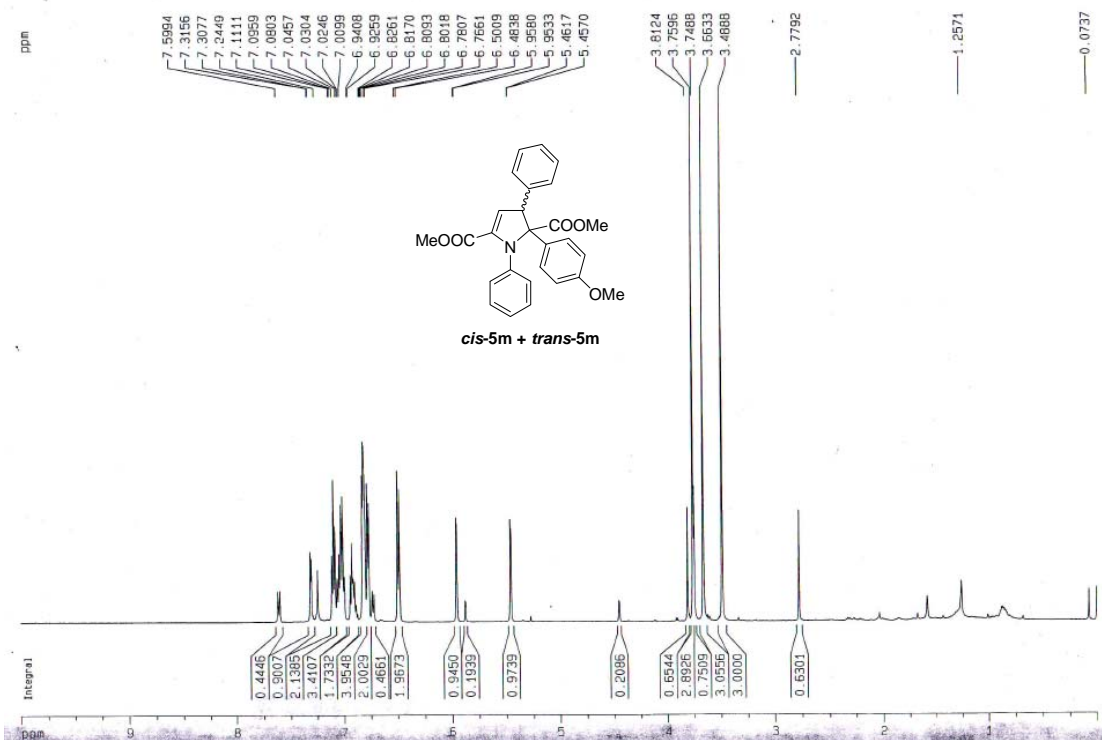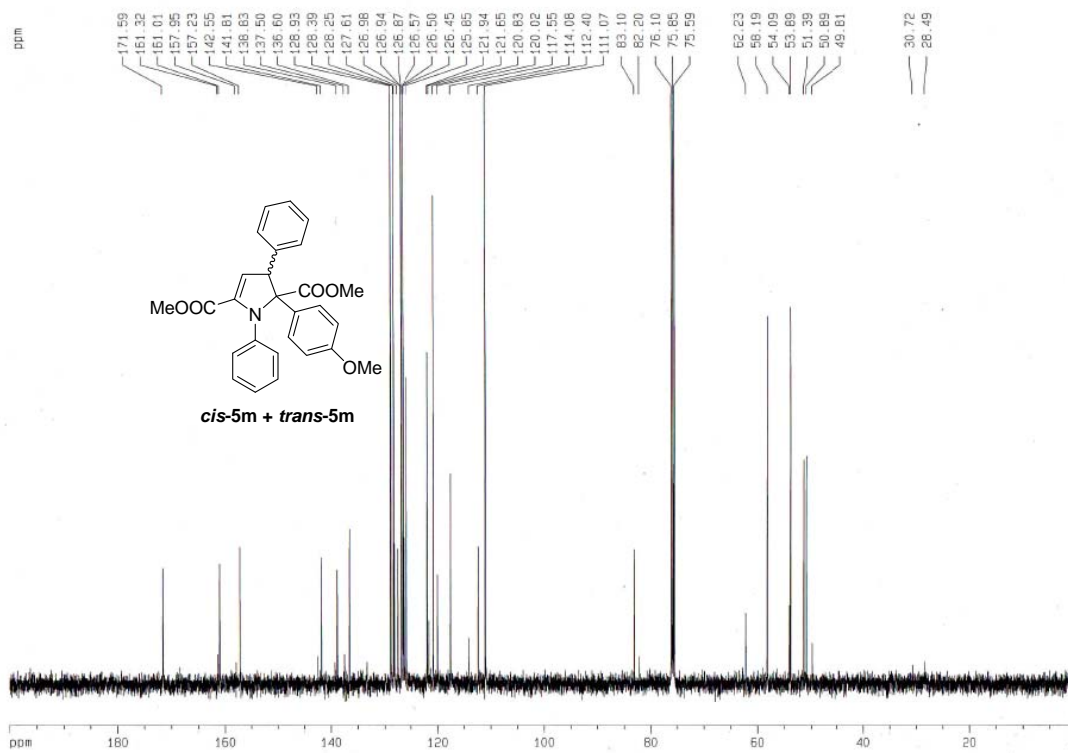



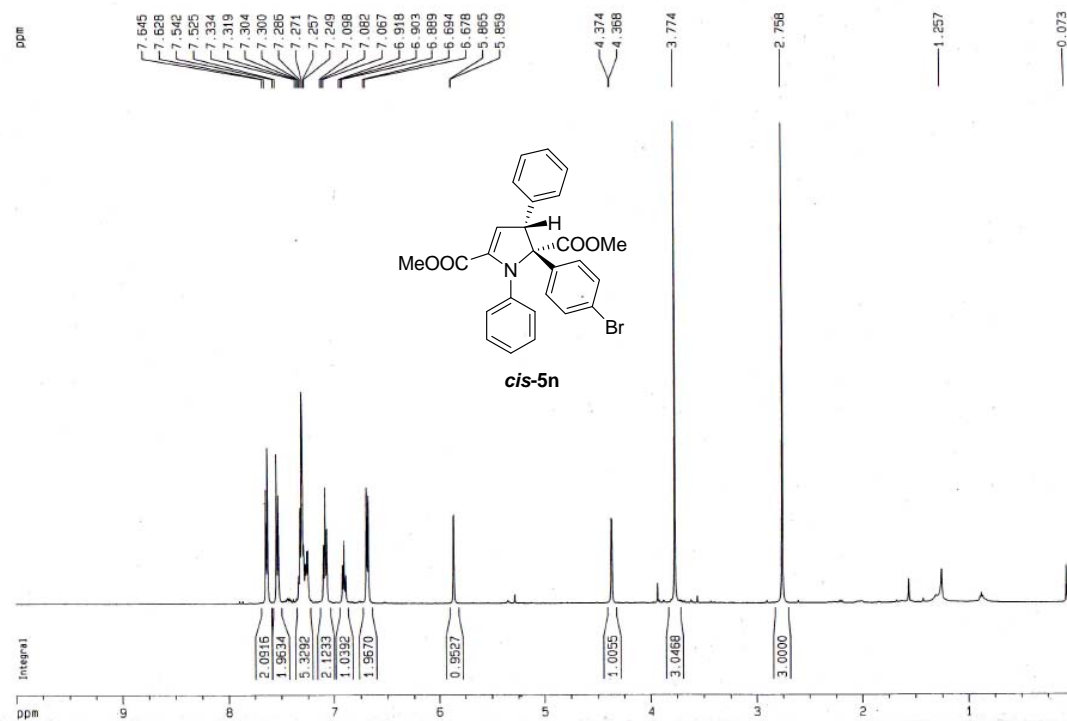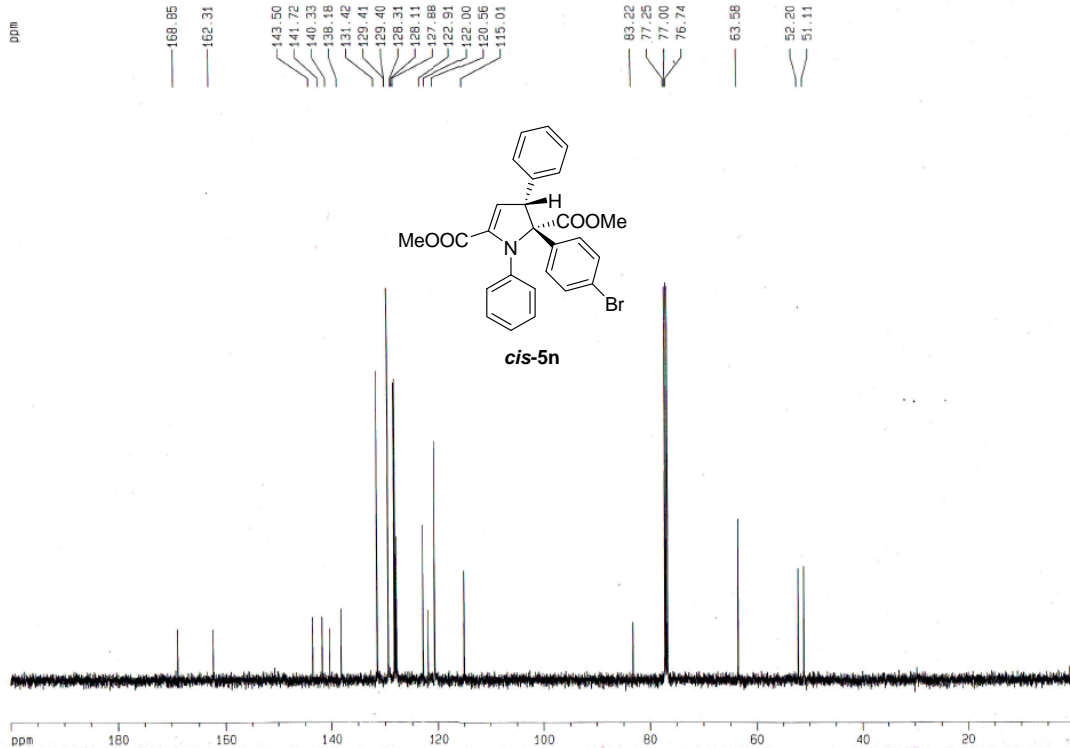

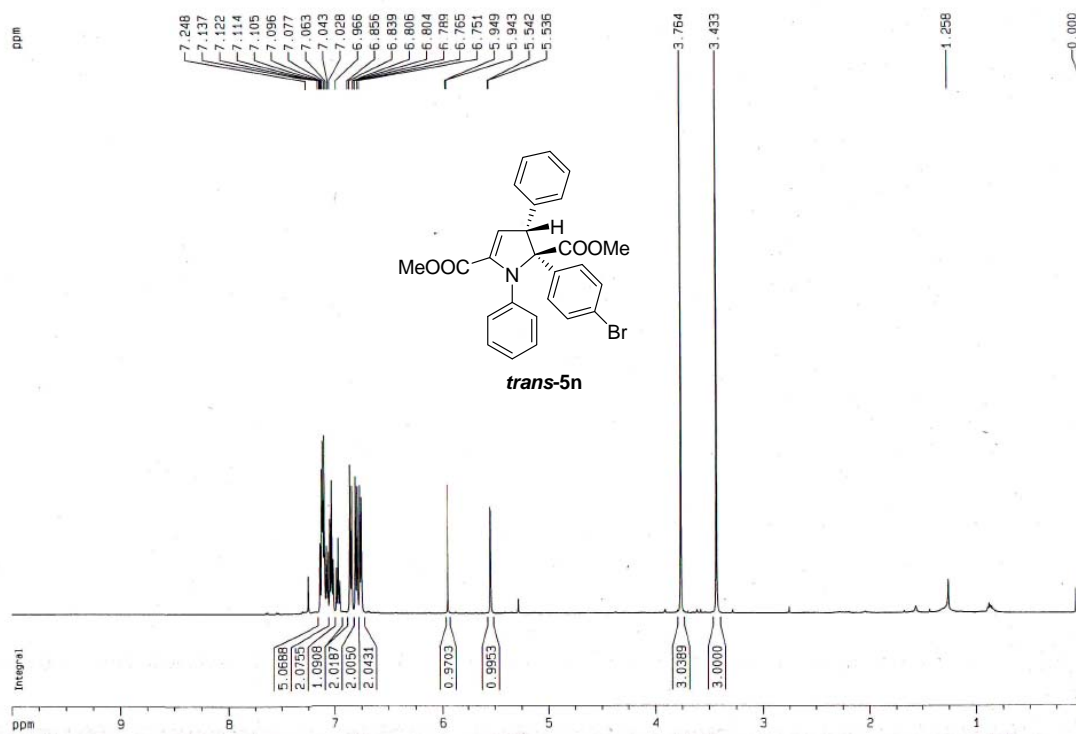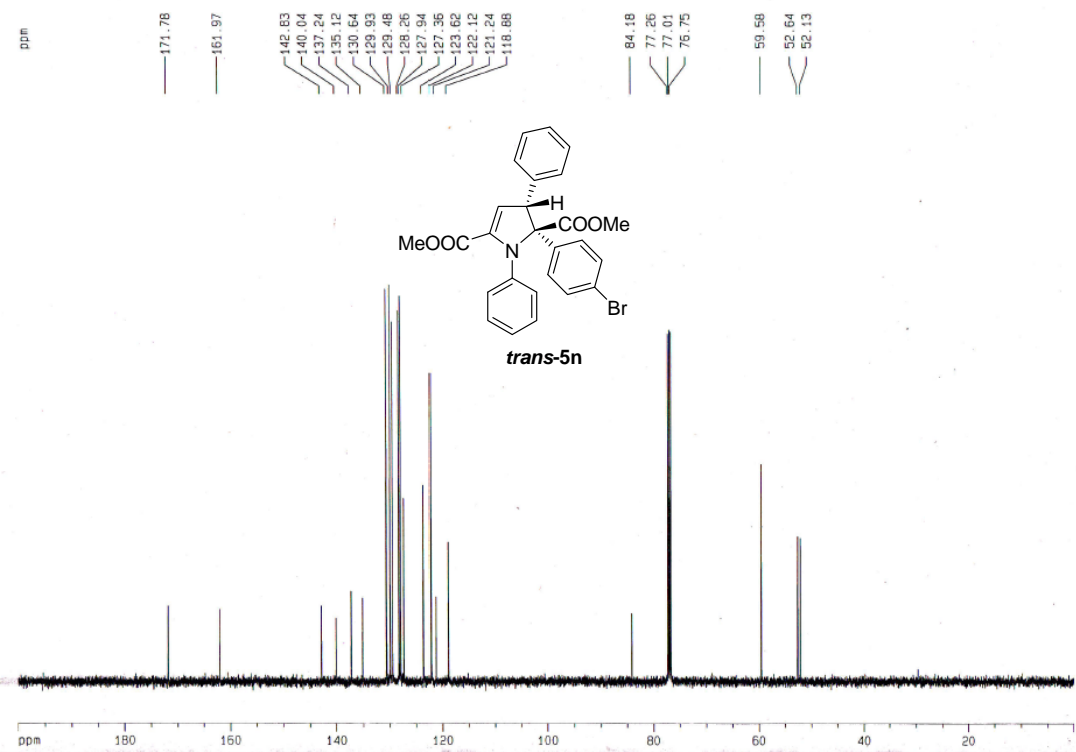

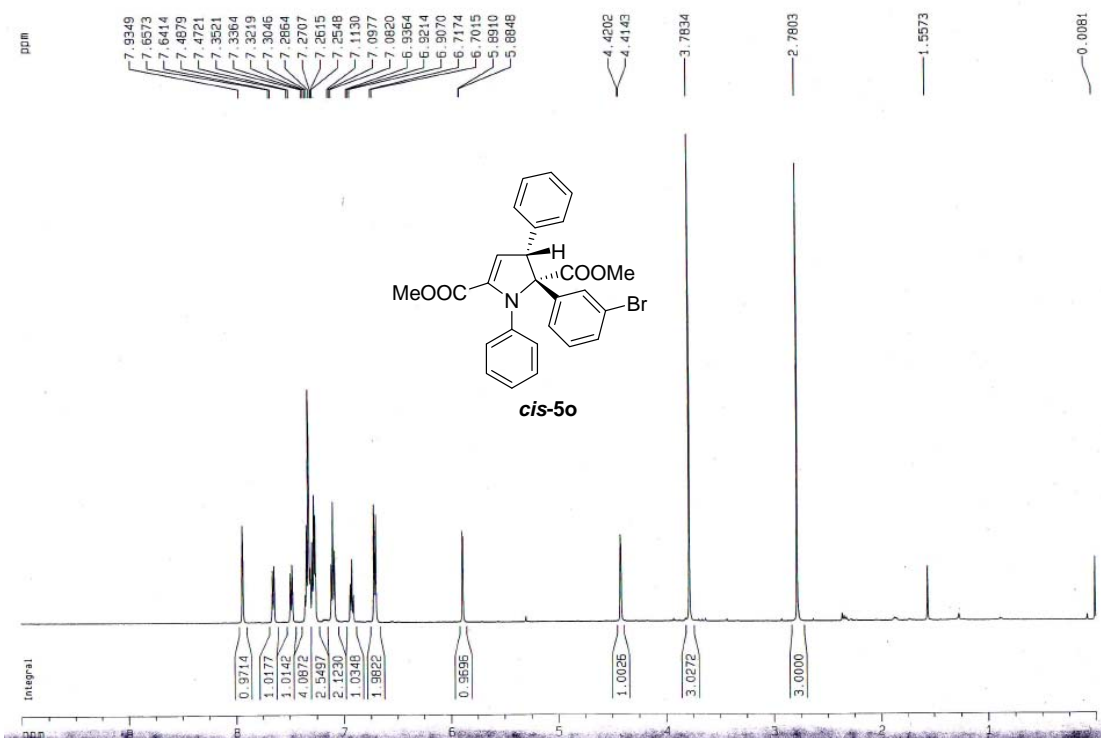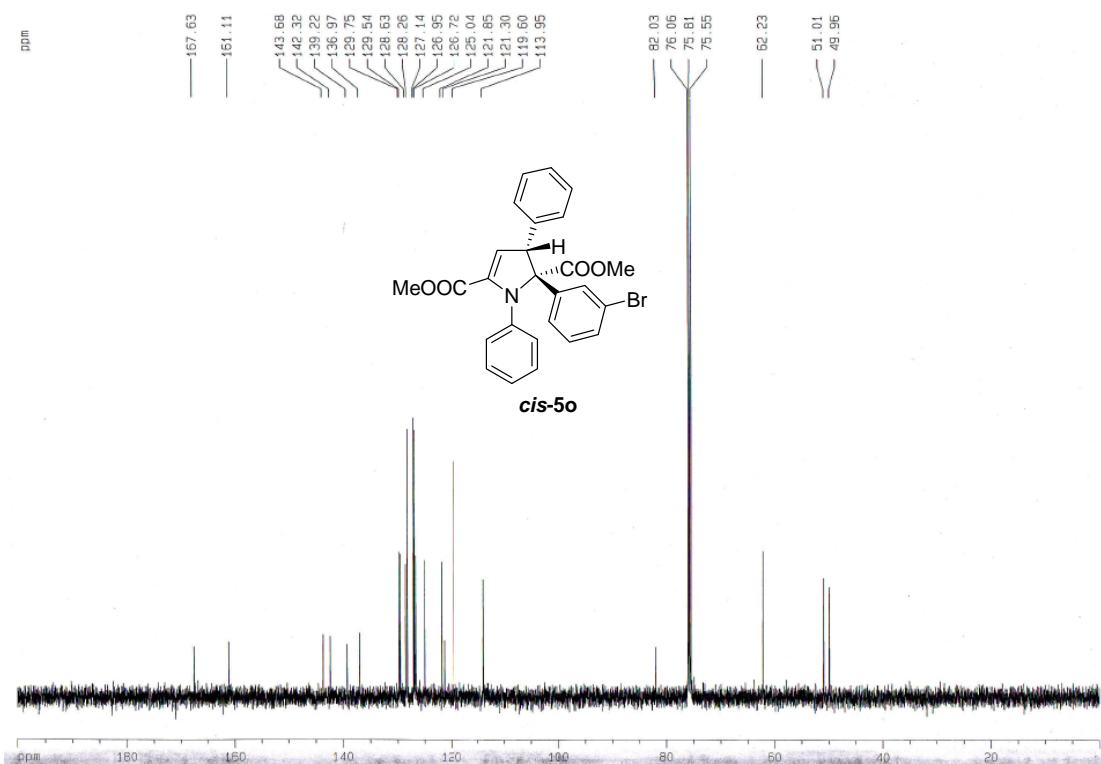

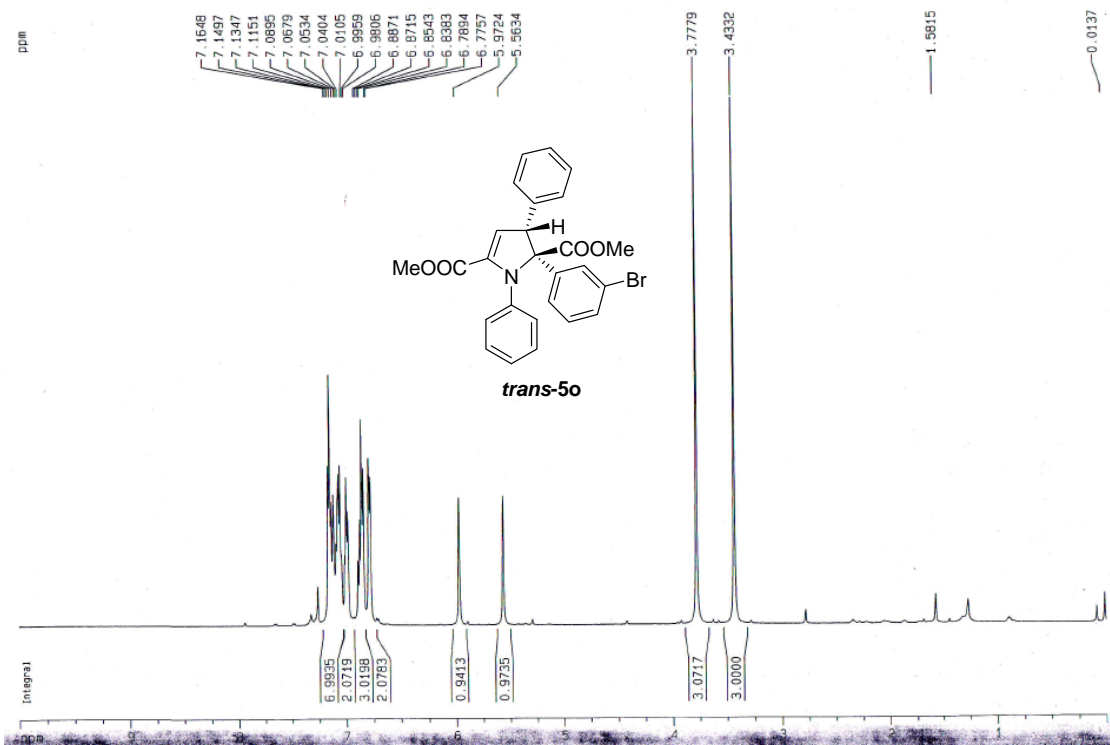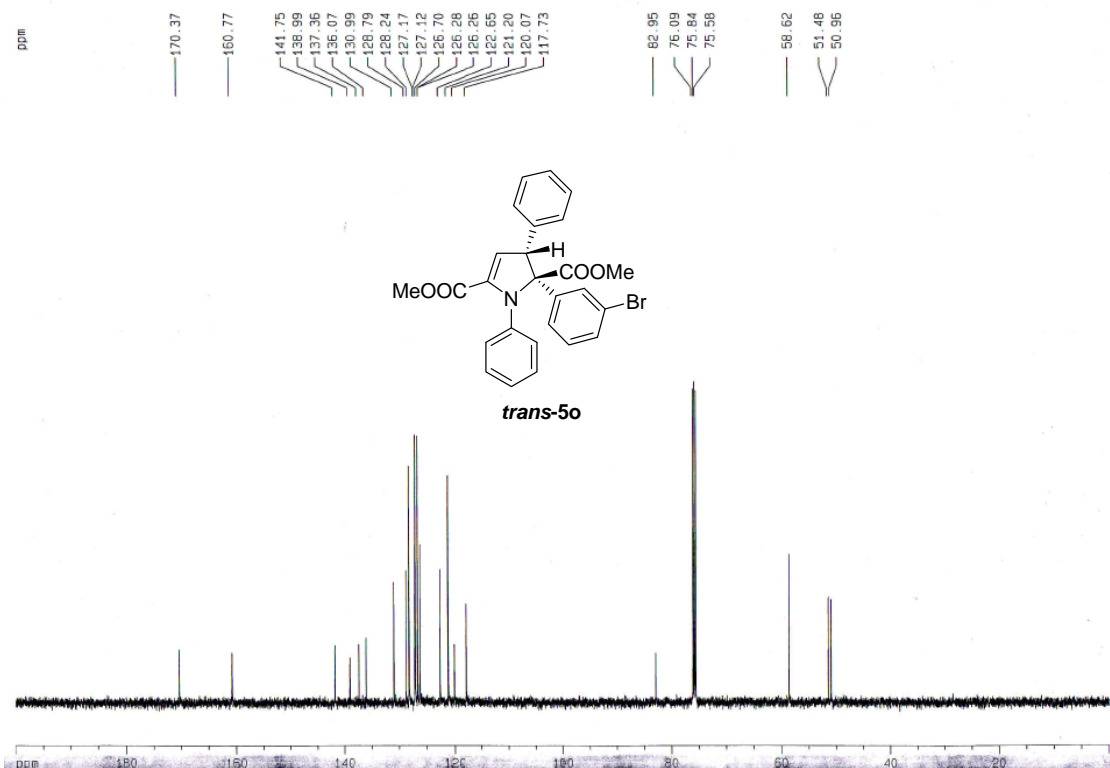

Supplement: b822626a.pdf [file b822626a.pdf]
